# Supplementary material for: Harmonized retrieval of middle atmospheric ozone from two microwave radiometers in Switzerland
Source: Copernicus journal article supplement (doi:10.5194/amt-2022-212), 2022-07-15
Supplement: Supplementary file [file amt-2022-212-RC1-supplement.pdf]

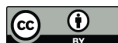

# Harmonized retrieval of middle atmospheric ozone from two microwave radiometers in Switzerland

Eric Sauvageat<sup>1,2</sup>, Eliane Maillard Barras<sup>3</sup>, Klemens Hocke<sup>1,2</sup>, Alexander Haefele<sup>3</sup>, and Axel Murk<sup>1,2</sup>

<sup>1</sup>Institute of Applied Physics, University of Bern, Bern, Switzerland

<sup>2</sup>Oeschger Centre for Climate Change Research, University of Bern, Bern, Switzerland

<sup>3</sup>Federal Office of Meteorology and Climatology MeteoSwiss, Payerne, Switzerland

**Correspondence:** Eric Sauvageat (eric.sauvageat@unibe.ch)

**Abstract.** We present new harmonized ozone time series from two ground-based microwave radiometers in Switzerland: GROMOS and SOMORA. Both instruments measure hourly ozone profiles in the middle atmosphere (20 – 75 km) since more than two decades. As inconsistencies in long-term trends derived from these two instruments were detected, a harmonization project was initiated in 2019. The goal was to understand and reduce the discrepancies between the two data records. The harmonization has been completed for the data from 2009 until 2022 and has been successful at reducing the differences observed between the two time series. It also explains the remaining differences between both instruments and flags their respective anomalous measurement periods in order to adapt their consideration for future trend computations.

We describe the harmonization and the resulting time series in detail. We also highlight the improvements in the ozone retrievals with respect to the previous data processing. In the stratosphere and lower mesosphere, the seasonal ozone relative differences between the two instruments are now within 10 % and show good correlations ( $R > 0.7$ ) except for summertime. We also perform a comparison of these new data series against measurements from the satellite instruments Microwave Limb Sounder (MLS) and Solar Backscatter Ultraviolet Radiometer (SBUV) over Switzerland. Seasonal mean differences with MLS and SBUV are within 10 % in the stratosphere and lower mesosphere up to 60 km and increase rapidly above.

## 1 Introduction

Ozone is a trace gas of great importance in the earth's atmosphere. It shields the surface of our planet from most of the sun's harmful ultraviolet radiation by absorbing it in the stratosphere (the "ozone layer") and consequently allowing life out of water. In the second half of the twentieth century, it was suggested that anthropogenic emissions of certain chemical compounds, the commonly called ozone-depleting substances (ODSs), were threatening this protective layer (Molina and Rowland, 1974; Crutzen, 1970; Farman et al., 1985; Solomon et al., 1986). As a result, severe depletion of the ozone layer was observed in the spring time over the Antarctic and led to the banning of ODS emissions formalized in the Montreal Protocol in 1987.

Since then, there has been an increased interest in the monitoring of ozone in the middle atmosphere to assess the effect of the Montreal Protocol. The reduction of ODSs emission has led to a decrease in total chlorine concentration since 1997 whereas the increasing greenhouse gases concentration is cooling the upper stratosphere (Anderson et al., 2000; Solomon et al., 2006). From the existing knowledge in middle-atmospheric chemistry, the combination of both factors should lead to



25 an observable recovery or even super recovery of ozone concentration at these altitudes (Eyring et al., 2010). In fact, over the  
polar regions, the stratospheric ozone concentrations have already begun their recovery towards pre-industrial levels (Solomon  
et al., 2016). Over the mid-latitudes, the situation is less obvious, and ozone recovery seems to differ depending on the altitude  
and the geographical area of interest (Braesicke et al., 2018; Petropavlovskikh et al., 2019; Tummon et al., 2015). In the upper  
stratosphere, the latest observations agree on a positive trend of ozone concentration despite a high variability in its significance  
30 and magnitude (Fahey et al., 2018; Steinbrecht et al., 2017; Bernet et al., 2019; Godin-Beekmann et al., 2022). In contrast, no  
clear indication of ozone recovery has been reported yet in the lower stratosphere and some observational evidence of further  
decline in this region were even reported (Ball et al., 2018). In a context of climate change, there remain also many unknowns  
regarding the influence of long-term dynamic and composition changes on middle-atmospheric ozone trends depending on the  
region (von der Gathen et al., 2021). In regards to these uncertainties, there is still a high need for accurate and long-term time  
35 series in the research field.

Microwave ground-based radiometers (MWRs) provide continuous, all-weather measurement of ozone in the middle atmo-  
sphere and are therefore well suited to estimate long-term trends and cross-validate satellite measurements (Hocke et al., 2007).  
Compared to other ground-based measurement techniques, they are able to retrieve ozone profiles from the stratosphere well  
into the mesosphere with a high temporal resolution but at the cost of a quite low vertical resolution.

40 In Switzerland, two ozone MWRs are operated since more than 20 years close to each other: the GROund-based Millimeter-  
wave Ozone Spectrometer (GROMOS) in Bern and the Stratospheric Ozone MONitoring RAdiometer (SOMORA) in Payerne  
(Fig. 1). They operate in the frame of the Network for the Detection of Atmospheric Composition Change (NDACC) (De Maz-  
zière et al., 2018). Such long-term time series of two ozone MWRs combined to a geographic proximity is unique worldwide  
and therefore offers the opportunity for extensive cross-validation. It also allows to investigate more thoroughly measurement  
45 uncertainties, possible instrumental failures, calibration and retrieval errors.

During the first phase of the activity "Long-term Ozone Trends and Uncertainties in the Stratosphere" (LOTUS), inconsis-  
tencies were found in ozone trend estimates from these two radiometers (Petropavlovskikh et al., 2019). In addition, Bernet  
et al. (2019) identified some anomalous period in the Bern time series and highlighted the need to account for these anomalies  
to compute more accurate trends. However, Bernet et al. (2019) did not investigate the reasons for such anomalies, and the  
50 differences between these two time series remained unexplained. Therefore, a harmonization project was initiated jointly by  
the operators of these two instruments in 2019 with the goal to understand their differences and reconcile their series while  
keeping them independent.

We present and validate here the new harmonized time series for GROMOS and SOMORA. We focus on the time period  
when both instruments use the same spectrometer, namely from the month of September 2009 until December 2021. We  
55 present the harmonization process applied to the data processing of the two radiometers, including a short description of  
the new calibration and retrieval routines. We also show the improvements resulting from this harmonization by comparing  
the new series with their previous versions. As a validation, we performed a cross-comparison between both instruments  
and compared them against satellite dataset, namely from the Microwave Limb Sounder (MLS) and the Solar Backscatter  
Ultraviolet Radiometer (SBUV).



60 A detailed description of the calibration and retrievals routines have been published in the form of two research reports available on the publication database of the University of Bern (Sauvageat, 2021, 2022) and a full documentation of the time series is available together with the data.

The manuscript is organized as follows. Section 2 presents the instruments, highlighting their similarities and differences. Section 3 presents the harmonization procedure applied to the calibration and retrieval routines. Section 4 presents the new  
65 harmonized ozone time series whereas section 5 presents comparisons and cross-validations against satellite measurements. Section 6 summarizes the main conclusions and gives an outlook.

## 2 Ozone microwave radiometry in Switzerland

Passive microwave radiometry uses the electromagnetic radiation emitted and transmitted in the microwave frequency region to derive geophysical quantities of interest. The large wavelengths associated with this spectral region make this technique  
70 relatively insensitive to atmospheric conditions. Therefore, it is suitable for both earth's surface observation from space and sounding of atmospheric trace gases, temperature or winds from satellites or ground-based instruments. In addition, the pressure broadening effect at microwave frequencies enables to retrieve vertical profiles of temperature, winds and abundances (e.g. Connor et al., 1994; Rüfenacht et al., 2012; Krochin et al., 2022).

Ozone possesses many rotational transition lines in the microwave region. Its emission lines at 110.836 and 142.175 GHz are  
75 most often used for ground-based observations because of their line intensity and the limited effect of water-vapor absorption at these frequencies.

GROMOS and SOMORA have been designed and built at the Institute of Applied Physics (IAP) at the University of Bern with quite similar components (Calisesi, 2003; Peter, 1997). They observe the ozone emission line around 142 GHz to retrieve hourly ozone profiles in the stratosphere and lower mesosphere ( $\sim 20$  to 75 km) using the Optimal Estimation Method.  
80 GROMOS is currently operated by IAP in Bern since 1994 and SOMORA is operated by the Federal Office of Meteorology and Climatology MeteoSwiss in Payerne since 2000 (see location in Fig. 1). The main characteristics of both instruments are summarized in Table 1.

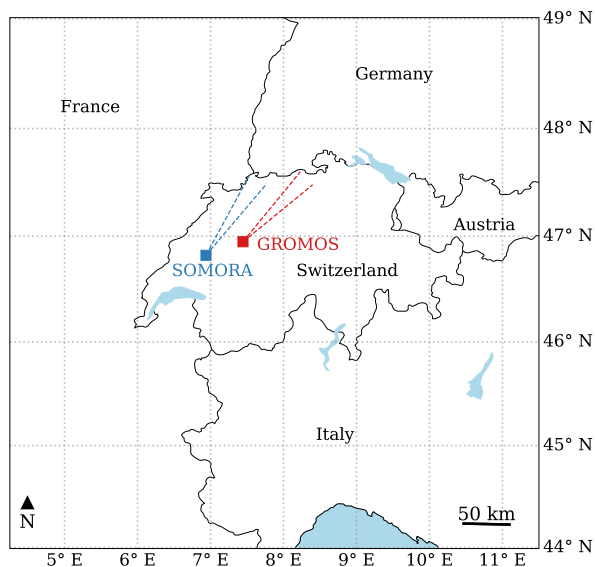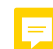

**Figure 1.** Location of GROMOS and SOMORA, with their approximate viewing directions.

**Table 1.** GROMOS and SOMORA microwave radiometers

|                        | <b>GROMOS</b>          | <b>SOMORA</b>          |
|------------------------|------------------------|------------------------|
| Location               | Bern                   | Payerne                |
| Latitude               | 46.95° N               | 46.82° N               |
| Longitude              | 7.44° E                | 6.94° E                |
| Altitude               | 560 m                  | 491 m                  |
| Azimuth angle          | 45°                    | 34°                    |
| Elevation angle        | 40°                    | 39°                    |
| Observation frequency  | 142.175 GHz            | 142.175 GHz            |
| Spectrometer           | Acqiris AC240          | Acqiris AC240          |
| Bandwidth              | 1 GHz (32768 channels) | 1 GHz (16384 channels) |
| Intermediate frequency | 3.7 GHz                | 7.1 GHz                |
| Frequency resolution   | 30.52 kHz              | 61.04 kHz              |
| $T_{rec}$              | ~ 2750 K               | ~ 2550 K               |





## 2.1 Spectrometers

The spectrometer is a key component of any MWR and can influence significantly its retrieval capabilities. Since 2009, both instruments use the same spectrometer, namely the Acqiris AC240 which is a digital Fast Fourier Transform (FFT) spectrometer (Benz et al., 2005; Muller et al., 2009). On SOMORA, it replaced an acousto-optical spectrometer in September 2009 whereas on GROMOS, it replaced discrete filter banks in July 2009. In both cases, the time series were homogenized using an overlap period of roughly two years and the pre-2009 time series were corrected with respect to the FFT spectrometer time series (e.g. Moreira et al., 2015; Maillard Barras et al., 2020). Whereas both instruments use the same digitizer with the same bandwidth of 1 GHz, it should be noted that the frequency resolution is two times higher for GROMOS than for SOMORA because GROMOS uses an in-phase quadrature (IQ) down-converter and digital sideband separation, which results in twice the number of channels (Murk et al., 2009). As a result, GROMOS should be more sensitive to ozone at higher altitude, but as it also has a higher noise compared to SOMORA, we do not see any significant differences in their sensitivities.

The AC240 is still being used in many MWRs however, it is ageing and has recently been shown to produce a spectral bias compared to more recent spectrometers, most likely impacting ozone retrievals as well (Sauvageat et al., 2021). In this contribution, we only focus on the period where both instruments use the AC240, namely from September 2009 to end of 2021. Therefore, both time series should be similarly impacted by the spectrometric bias and it should not question the results of the comparisons between GROMOS and SOMORA. This might however, influence the comparisons against the satellite observations but there is unfortunately no way to confirm the amplitude of the effect of the bias on the ozone profiles at the moment.

## 3 Harmonization process

Discrepancies were identified between GROMOS and SOMORA data series and trends (Bernet et al., 2019; Petropavlovskikh et al., 2019; Maillard Barras et al., 2020), for which no explanations could be found. Due to their geographic proximity and similar observation geometry, the differences are too big to be geophysical. The data processing however, was quite different between the instruments and therefore it was decided to reprocess both time series with new and harmonized algorithms. It aims at a complete harmonization of the data processing, from the raw data (level 0) to the ozone profiles (level 2) with the purpose to improve the agreement between both instruments while keeping them fully independent.

The harmonization project can be separated in two distinct parts: the calibration of the radiometric data (level 0 to 1) and the retrievals of ozone profiles (level 1 to 2). Section 3.1 will briefly describe the new calibration and integration routines (see Sauvageat (2021) for details) whereas section 3.2 will describe the retrievals of ozone profiles from the calibrated spectra.



### 3.1 Calibration

GROMOS and SOMORA are both total power radiometers with superheterodyne receivers. They measure the atmospheric ozone emission line around 142.175 GHz and use the heterodyne principle to down convert the incoming radiation (RF signal) to an intermediate frequency (IF) by mixing with a local oscillator frequency (LO) which allows for easier signal processing.

115 Due to their high sensitivity, the operation of microwave radiometers requires continuous calibration (e.g. Ulaby and Long, 2014, chap. 7) and both instruments use a so-called hot-cold calibration scheme. Using a rotating mirror fixed on a path length modulator, they are continuously switching between the atmospheric observation, a hot and a cold calibration target. In both instruments, a heated black-body kept at a constant temperature ( $T_{hot} \approx 310\text{K}$ ) is used as hot load whereas liquid nitrogen (LN2) observation is used as cold load. Both instruments use a Martin-Pupplet Interferometer (MPI) to suppress the  
120 contribution of the undesired sideband. The pathlength modulator is used to mitigate the standing-waves between the receiver and the calibration targets, which are otherwise causing systematic baseline errors on the calibrated spectra. In parallel to the hot-cold calibration scheme, the instruments also perform tipping curve calibration (Ingold et al., 1998) as cross-validation for the LN2 calibration. Assuming linear transfer characteristics, the atmospheric spectral radiance can then be determined and further converted to brightness temperature using the Planck's law (e.g. Ulaby and Long, 2014, chap. 6).

125 Despite similar design and raw data content, the previous calibration routines for GROMOS and SOMORA were different. Therefore, a new routine was designed to harmonize the calibration between the two instruments. The calibration essentially converts the raw spectrometer measurements to radiance intensity and integrates them together on a chosen integration time. For this new routine, the calibration results in two different data levels, namely the calibrated spectrum (level 1a) and the integrated spectrum (level 1b).

130 Harmonized quality control was introduced in order to identify spurious instrumental signals. It flags the most common technical problems at the level 1a (e.g. Noise temperature jumps, LN2 refills, LO frequency shifts...) and combines them into a single instrumental flag value for the level 1b (Sauvageat, 2021).

Considering instrumental issues and technical interruptions for maintenance (e.g. for LN2 refilling or instrument repairs), GROMOS and SOMORA provided respectively 87 % and 89 % of good quality hourly spectra on the period 2009-2021, with  
135 over 80'000 hours of comparable measurements.

### 3.2 Retrieval setup

In the microwave frequency range, the pressure-broadening effect of atmospheric emission lines is used to retrieve information on the atmospheric constituent profile from the calibrated microwave emission spectra. This so-called retrieval is a well validated technique which has been successfully applied to temperature, wind, and many trace gases like O<sub>3</sub>, CO or H<sub>2</sub>O (Janssen,  
140 1993, chap. 7). Among the different retrieval techniques, we selected the Optimal Estimation Method (OEM) following the formalism described by Rodgers (2000). This statistical method extracts the best estimate of an atmospheric profile from a set of measurements with noise, a priori information, and a forward model. In addition, the OEM enables to characterize the error budget of the retrievals (Fig. 3 and Fig. 4). In the following, we will briefly present and discuss the new harmonized retrieval



145 setup used for GROMOS and SOMORA. More information on this setup is available in Sauvageat (2022). For detailed infor-  
mation on the OEM or its application to ozone profiling instruments, the reader is redirected to Parrish et al. (1992) or Tsou  
et al. (1995).

### 3.2.1 Forward model

150 In the case of ground-based microwave radiometry, the forward model (FM) describes the radiative transfer physics between  
trace gases emissions and the instrument's receiver. We used the Atmospheric Radiative Transfer Simulator 2.4 (ARTS), an  
open source software with a special focus on microwave radiative transfer simulations (Eriksson et al., 2011; Buehler et al.,  
2018). In addition, it offers a fully integrated OEM retrieval environment and includes many tools to help simulate and retrieve  
the sensor's influence on the radiometric measurements (Eriksson et al., 2006).

155 ARTS offers many possibilities to define the atmospheric state, a priori data, and simulation grids. We use one-dimensional  
pressure and temperature profiles from the European Centre for Medium-Range Weather Forecasts (ECMWF) daily operational  
analysis (6 hour time and  $1.125^\circ$  spatial resolution). This dataset is limited to approximately 70 km altitude and therefore, we  
extend it using the COSPAR International Reference Atmosphere (CIRA-86) climatology at upper altitudes (Chandra et al.,  
1990). The frequency grids have been defined to cover the range of GROMOS and SOMORA spectrometers with a refined  
frequency resolution around the ozone line: it matches the spectrometer resolution at the line center to optimize retrievals at  
higher altitudes, whereas the spectral resolution is coarser on the line wings to limit computation time.

**Table 2.** Main parameters used in GROMOS and SOMORA retrievals

|                           |                                                                      |
|---------------------------|----------------------------------------------------------------------|
| Forward model             | ARTS                                                                 |
| Species                   | O <sub>3</sub> , H <sub>2</sub> O, O <sub>2</sub> and N <sub>2</sub> |
| Spectroscopy              | Perrin (JPL & HITRAN)                                                |
| Atmospheric state         | 1D ECMWF & CIRA 86                                                   |
| O <sub>3</sub> a priori   | WACCM                                                                |
| H <sub>2</sub> O a priori | ECMWF                                                                |
| FM grid                   | ~ 1 – 112 km, 2 km resolution                                        |
| Retrieval grid            | ~ 1 – 95 km, 2 km, resolution                                        |

160 As atmospheric species, we use ozone, water vapour, oxygen and nitrogen. For ozone, we use the spectroscopic database  
from Perrin et al. (2005), which is provided with ARTS 2.4 and is derived from the HITRAN and JPL spectroscopic databases.  
For water vapour, oxygen and nitrogen, we use the parametrizations provided within ARTS (see Buehler et al., 2005). A

summary of the main retrievals parameters used for GROMOS and SOMORA can be found in Table 2 and more details are provided in Sauvageat (2022).

### 165 3.2.2 Ozone retrieval

The main retrieval quantity is hourly ozone volume mixing ratio (VMR) from the stratosphere to the lower mesosphere, i.e. between  $\sim 100$  and  $0.01$  hPa. The a priori are monthly ozone profiles extracted from free-running simulations of the Whole Atmosphere Community Climate Model (WACCM) as described in Schanz et al. (2014). Further, depending on the local solar time, we either use a daytime or nighttime a priori ozone profile. The a priori covariance matrix for ozone varies with  
170 atmospheric pressure in order to optimize the information from the measurements in the stratosphere and lower mesosphere. It includes exponentially decreasing covariances between pressure levels to reflect the vertical coupling of the atmosphere.

### 3.2.3 Sensor and noise

The accuracy of the retrievals can be improved by taking the systematic characteristics of the instrument into account. ARTS has dedicated built-in functions that can model the influence of the most relevant components on the atmospheric observations  
175 (Eriksson et al., 2006). For GROMOS and SOMORA, we included the effect of the FFT spectrometer channel response ( $|\frac{\sin(x)}{x}|^2$ ) and the effect of the sideband ratio.

The measurement noise is an important quantity for OEM retrievals because it defines, together with the a priori covariance, the information that can be extracted from the measurement at each pressure level. The noise covariance matrix is computed independently for each instrument and each retrieval based on the noise level observed on the integrated spectrum and is  
180 considered to be uncorrelated between the different channels similarly as explained in Krochin et al. (2022). It is slightly higher for GROMOS ( $\approx 0.7$  K) than SOMORA ( $\approx 0.5$  K) because GROMOS has a higher receiver noise temperature and a higher frequency resolution.

### 3.2.4 Additional retrieval quantities

There are other sensors or external influences which are difficult to estimate and correct during the calibration process or to  
185 simulate accurately for each spectrum. This is the case for the instrumental baselines and the tropospheric absorption. The instrumental baselines are modulation of the atmospheric spectrum due to the observing system. They can arise during the mixing process, the sideband filtering or can be due to undesired reflections, typically when observing the calibration targets. In ARTS, it is possible to consider them as unknown and add them as additional retrieval quantities.

Around the 142 GHz ozone line, the tropospheric water continuum contributes significantly to the observed spectra and has  
190 to be considered during the inversion process. One simple correction method is the so-called tropospheric correction (Ingold et al., 1998) but it is certainly a better solution - also in view of assessment of the error propagation - to include the tropospheric water vapour as a retrieval quantity within ARTS, as has been done previously for such retrievals (e.g. in Palm et al., 2010).



A frequency shift was also retrieved for each spectrum because the local oscillators of both GROMOS and SOMORA are not perfectly stable and even a slight shift of the reference frequency can bias the ozone profile retrievals.

195 Despite mitigation of instrumental baselines using different techniques (e.g., mirror wobbling, non-perpendicular aspect of cold load), it is often necessary to retrieve some instrumental baselines as well (Palm et al., 2010). In the case of GROMOS and SOMORA, we include a second-order polynomial and different sinusoidal baselines. In order to avoid the degradation of the retrievals with the addition of too many sinusoidal baselines, we processed first the full time series without any sinusoidal baselines and used the residuals to compute the main sinusoidal baseline periods for each instrument. We observed that the  
200 sinusoidal baseline periods remain similar on time-scale of month to years so in practice, only a few period changes were applied during the full extent of the time series for each instrument (see Sauvageat (2022) for details).

### 3.2.5 Retrieval results

For each retrieval quantity, the OEM returns the statistical best estimates of the results and ARTS returns the corresponding fitted atmospheric spectrum which can be compared against the MWR observation to evaluate the goodness of the fit. Figure 2  
205 shows examples of hourly integrated spectra from GROMOS and SOMORA together with their fitted measurement spectra.

Figures 3 and 4 show the corresponding ozone retrievals and main diagnostic quantities for the spectra shown in Fig. 2. It includes the averaging kernels (AVKs) which are a measure of the sensitivity of the retrieval to the true ozone profile at each pressure level. The sum of the AVKs at each level defines the measurement response (MR). It is an indication of the measurement contribution to the retrieved profile, whereas the remaining information comes from the a priori. In microwave  
210 remote sensing, a MR of 80 % is often used to define the lower and upper boundaries of the retrievals in order to limit the influence of the a priori on the results. Also included as diagnostic quantities are the smoothing and measurement errors computed by the OEM as defined by Rodgers (2000). The smoothing error is a consequence of the limited resolution of the instrument whereas the measurement error arises from the noisy nature of the observations. Finally, we show the Full Width at Half Maximum (FWHM) of the AVKs at each level and the altitude offset (in km) between the AVKs maximum and its  
215 corresponding altitude. Both together give an indication on the altitude resolution and the vertical offset between the true and retrieved profiles.

### 3.3 Uncertainty budget

The retrievals errors presented above do not include systematic errors that can arise during the calibration or the retrievals. It is cumbersome to estimate all possible errors on such complex measurement setup and therefore, we decided to perform  
220 a sensitivity analysis on the most important error sources using two reference time periods with low and high atmospheric opacities. The uncertainties considered in our study are listed in Table 3 as well as the perturbations used for the sensitivity analysis. These were determined in different ways for each error source, deriving it either from measurement (e.g.  $T_{cold}$ , sideband ratio, window transmittance) or empirical values (e.g. pointing, spectroscopy).

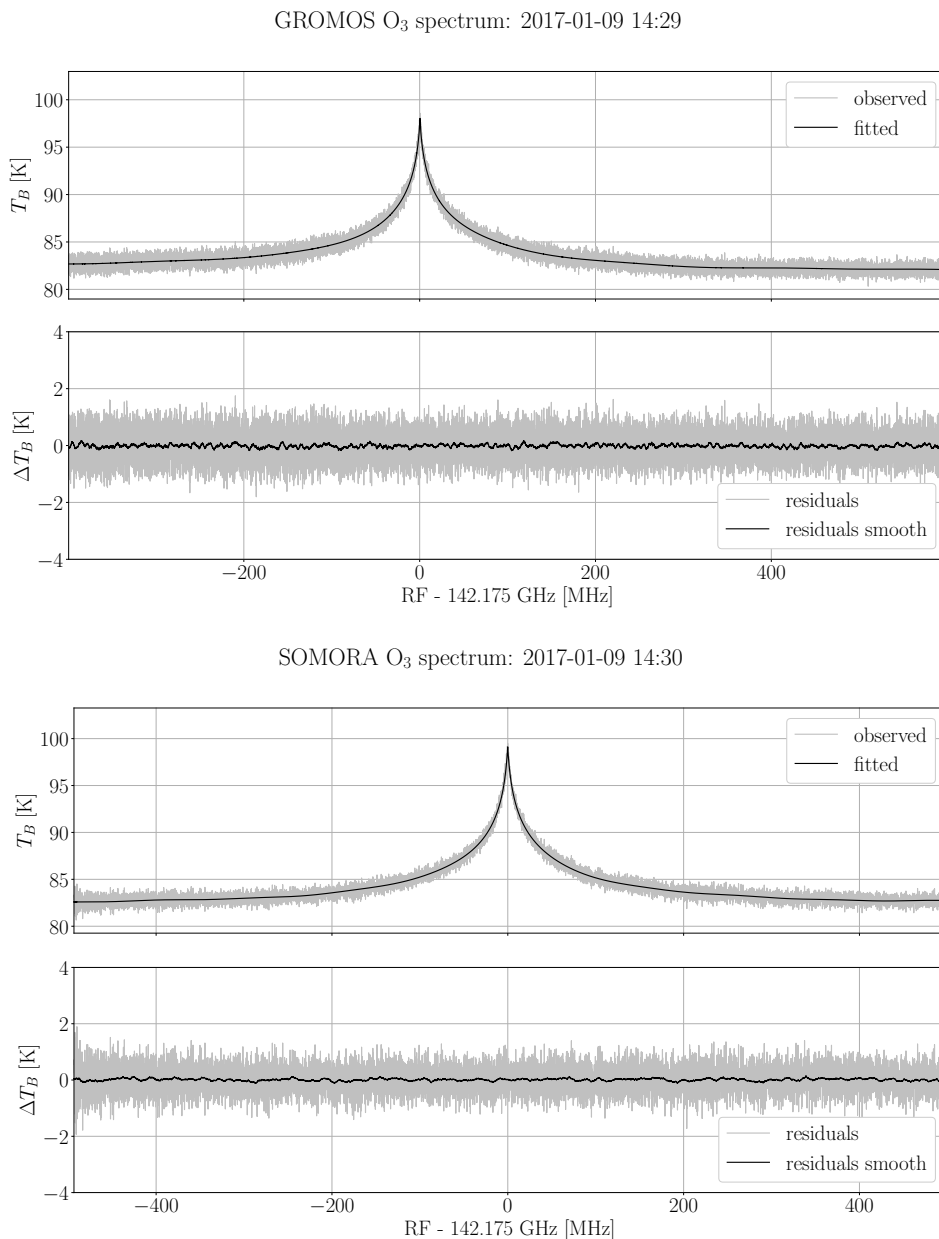

**Figure 2.** Integrated and fitted spectrum for GROMOS and SOMORA, binned to the same spectral resolution. The lower panels show the residuals, i.e. the differences between the measurement and the fitted spectrum. The smoothed residuals are computed using a running mean over 128 channels.

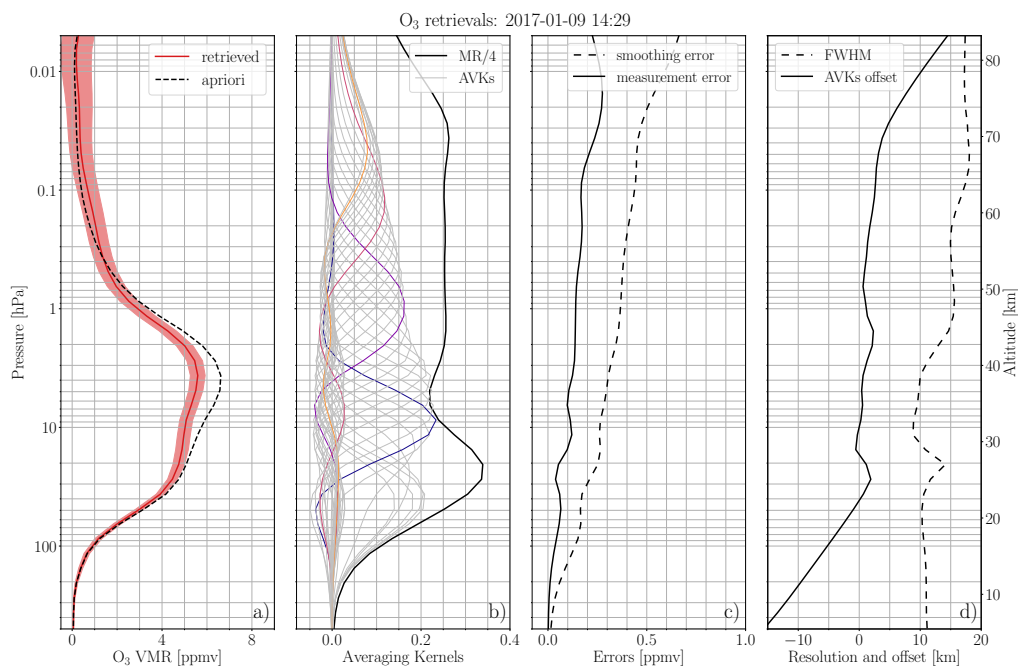

**Figure 3.** Example of GROMOS retrievals on 09.01.2017 a) shows the a priori and retrieved ozone profiles, b) shows the averaging kernels together with the MR (divided by 4 to fit in the same plot), c) shows the smoothing and measurement error and d) shows the Full Width at Half Maximum (FWHM) and the offset between the AVKs peak and its corresponding altitude. All quantities are retrieved on pressure levels and corresponding altitudes are indicated on the right. See text for more details on each diagnostic quantity.

**Table 3.** Potential error sources and the perturbations used for the sensitivity analysis

|                      |                                                         |         |
|----------------------|---------------------------------------------------------|---------|
| pointing             | error on the zenith angle                               | 1°      |
| $T_{cold}$           | cold calibration target temperature                     | 2 K     |
| window transmittance | transmittance of the windows in front of the instrument | 3 %     |
| $T_{profile}$        | constant offset in atmospheric temperature profile      | 5 K     |
| spectroscopy         | error in spectroscopic line intensity                   | 3 %     |
| sideband ratio       | error in MPI path length difference                     | 0.05 mm |

The uncertainty budget for GROMOS and SOMORA is presented in Fig. 5 and Fig. 6 in the case of low tropospheric opacities. The high opacity cases for both instrument can be seen in Appendix A (Fig. A1 for GROMOS and Fig. A2 for SOMORA).

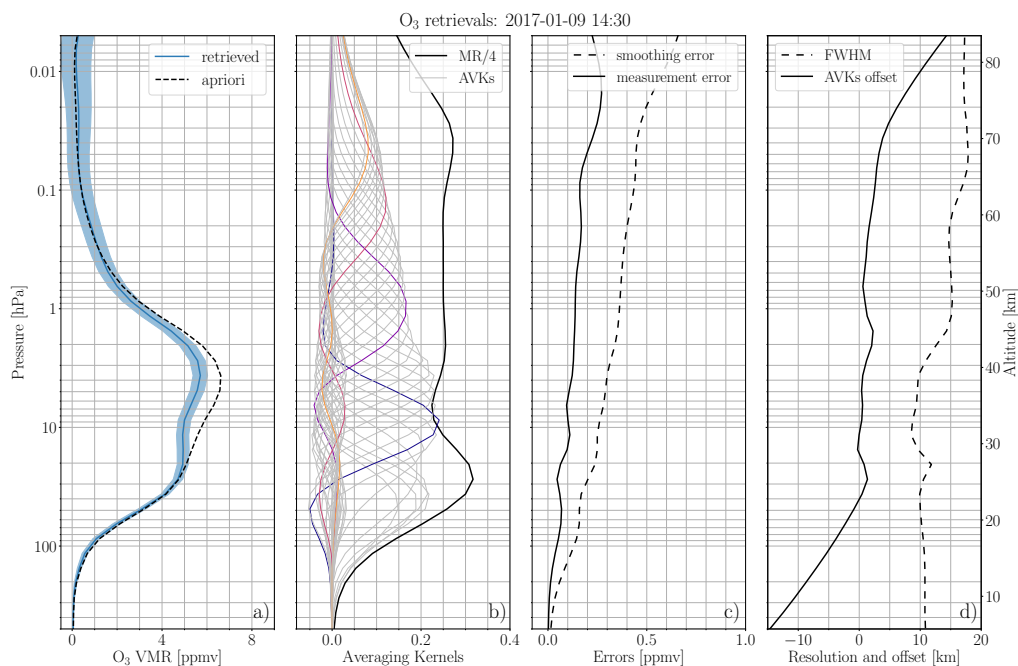

**Figure 4.** Same as Fig. 3 but for SOMORA.

In general, the sensitivity of GROMOS and SOMORA to the different perturbations is very similar. Notable exception is the GROMOS higher sensitivity to the sideband path length which is a consequence of its lower intermediate frequency. For both instruments, the total uncertainty is dominated by systematic errors below 2 hPa whereas the measurement noise becomes quickly dominant above. In relative terms, the uncertainty is approximately 9 – 10 % for GROMOS, respectively 7 – 8 % for SOMORA, up to the stratopause and increases then significantly in the mesosphere. In the case of high atmospheric opacity, the uncertainties are higher which is expected since the ozone emission line gets more attenuated by the tropospheric water vapor absorption. In this case, the total relative uncertainty on GROMOS in the stratosphere is 12 – 15 %, respectively 10 – 12 % for SOMORA. In views of the perturbations and error sources considered in this study, these values compare well with similar ozone radiometers at other locations reported in the literature (e.g., Palm et al., 2010; Kopp et al., 2002).

#### 4 Harmonized ozone time series

Using the new calibration and retrieval routines described previously, we have reprocessed the GROMOS and SOMORA data series for the time where they both use the AC240 spectrometer, i.e. from the end of 2009 until 2021. Fig. 7 shows weekly averaged ozone profiles for GROMOS and SOMORA for the decade 2010-2020. It shows the consistency of the measurements and highlights the very few large interruptions happening on both instruments during this period. Most interruptions are due to instrumental issues (LN2 refilling, LO frequency stability, ...) or to the atmospheric conditions (e.g. high tropospheric opacity



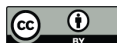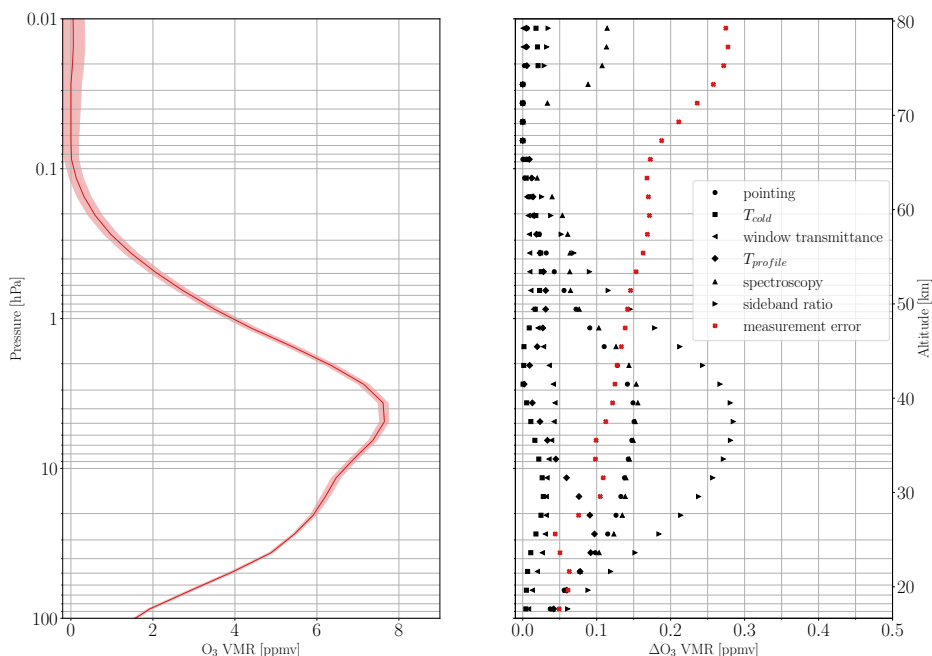

**Figure 5.** Uncertainty budget for GROMOS at low opacity case. The left panel show the reference ozone profile chosen for the sensitivity analysis. The right panel shows the ozone VMR uncertainties arising from the error sources listed in Table 3.

masking the ozone emission line) and they usually last for a few hours at most. The longer interruptions result from cold load issue or hardware changes which can last for a few days or weeks.

To validate these two data series, we first present a cross-comparison of GROMOS and SOMORA data series and show the improvement resulting from the reprocessing compared to the previous retrieval version. We then compare both instruments against space-based ozone observations from MLS and SBUV above Switzerland.

#### 4.1 Cross-comparison between GROMOS and SOMORA

In views of their close location, GROMOS and SOMORA can be used for cross-validation of their time series. In addition, both instruments have similar viewing direction, altitude range and sensitivity so they can be compared directly. The upper panel in Fig. 10 shows the weekly mean relative differences between GROMOS and SOMORA. In general, GROMOS and SOMORA agree well in most of the middle atmosphere, with relative differences lower than 10 % in the upper stratosphere and lower mesosphere (from ~ 50 to 0.1 hPa), increasing towards lower and higher altitudes. The higher relative differences at lower and higher altitudes are partly explained by the shape of the ozone VMR profile which intensity is maximum in the

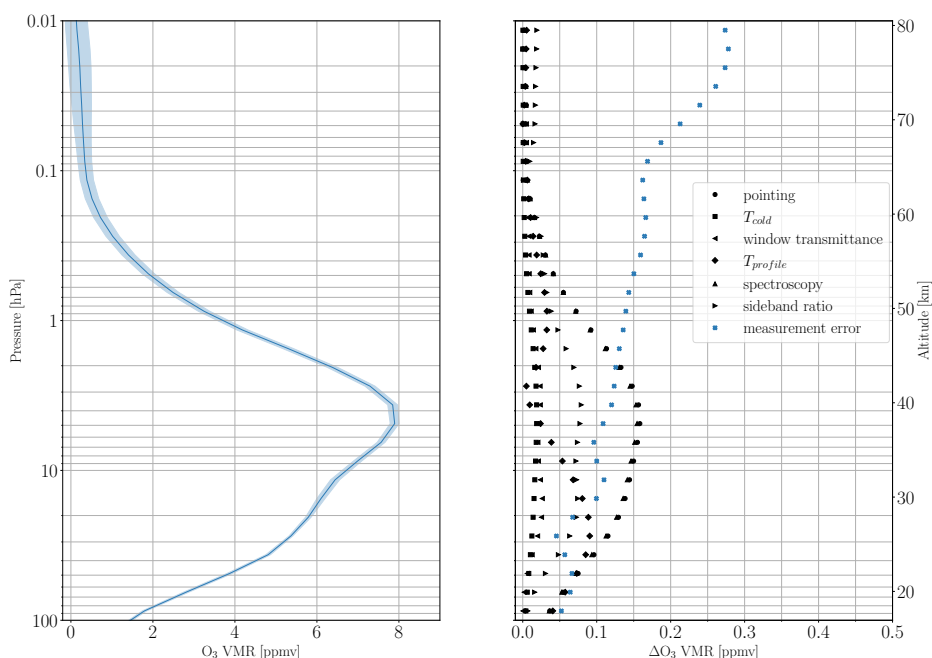

**Figure 6.** Same as Fig. 5 but for SOMORA.

stratosphere. In general, the lower altitudes are also the most impacted by instrumental baselines which explains the increase  
255 of the differences below 50 hPa whereas at higher altitudes, the instrumental noise becomes the dominant factor and the  
sensitivity of the radiometers decreases quickly. In addition, the diurnal ozone variations typically become much larger in the  
mesosphere (e.g. around 20 % compared to a few percent in the stratosphere (Haefele et al., 2008)).

We also see some oscillatory patterns in the relative differences, some of which can be identified as clear seasonal patterns  
(e.g. in the lower stratosphere between 2014 and 2017). The reasons for such seasonal patterns are not fully clear but are most  
260 likely the result of seasonal temperature and humidity cycle in the troposphere. Indeed, despite controlled room temperature for  
both instruments, the higher summer temperature and humidity still influence room and window temperatures and consequently  
the instruments (e.g. receiver noise temperature). We believe that the hardware components of GROMOS and SOMORA have  
different sensitivity to such influences, which could explain the seasonal patterns observed in their relative differences. The  
warmer and wetter troposphere also emits more microwave during the summertime which tends to stronger absorb the ozone  
265 spectral lines and decreases the retrieval sensitivity during summer. As discussed in section 3.3, a higher tropospheric opacity  
also results in larger uncertainties on the retrieved ozone profile. In case of very hot and humid conditions, the troposphere can  
become optically thick at 142 GHz which can prevent the retrieval of ozone profiles.

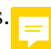

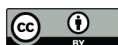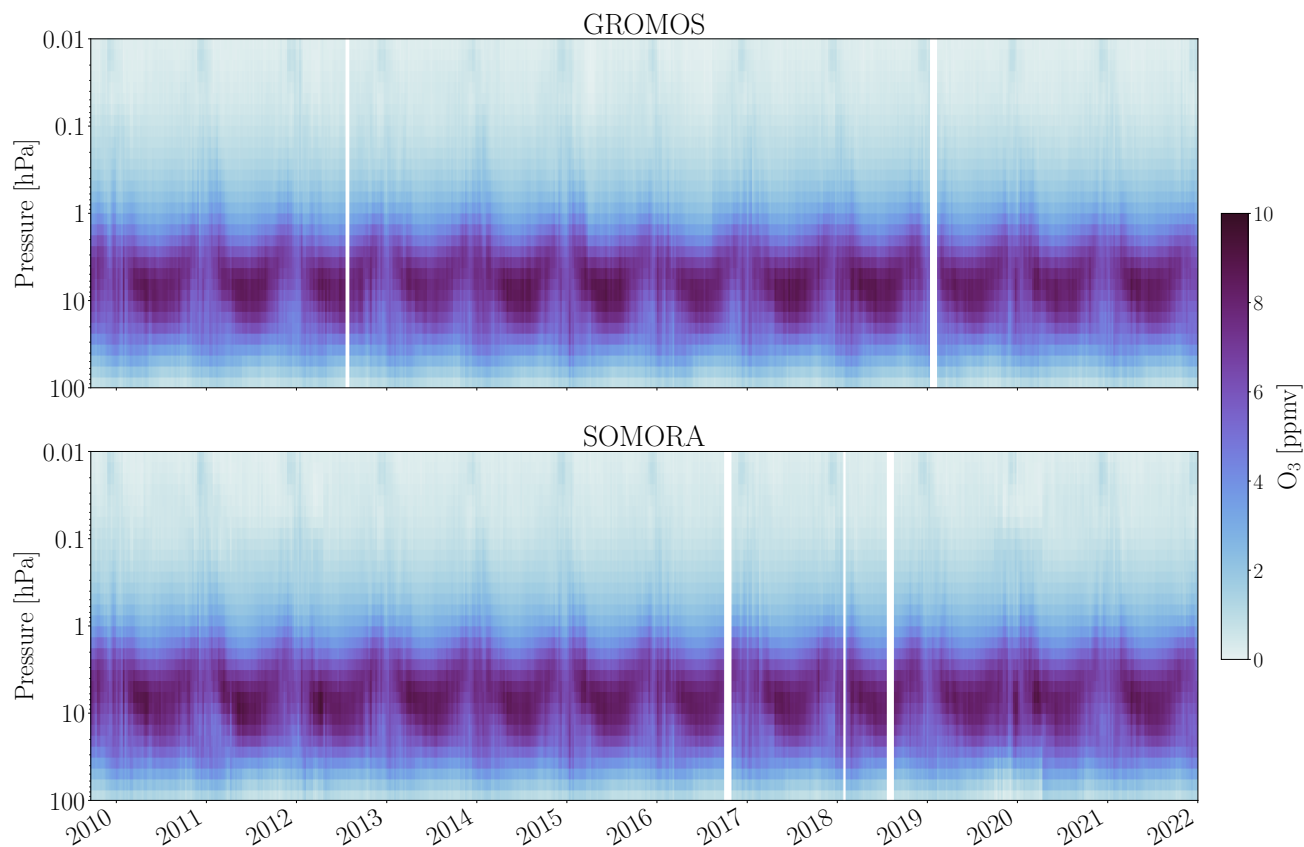

**Figure 7.** Weekly averaged ozone volume mixing ratios (VMR) profiles for GROMOS and SOMORA.

**Table 4.** Definition of the three pressure ranges and corresponding altitudes

| Region             | Pressure range [hPa] | Approximate altitudes [km] |
|--------------------|----------------------|----------------------------|
| Lower mesosphere   | 0.9 – 0.1            | ~ 50 – 65                  |
| Upper stratosphere | 5 – 1                | ~ 38 – 50                  |
| Lower stratosphere | 50 – 10              | ~ 22 – 32                  |

These seasonal differences are highlighted in Fig. 8 which show seasonal ozone profile comparisons between GROMOS and SOMORA. The mean seasonal differences between the two instruments are lower than 10 % at all seasons and throughout most of the middle atmosphere and show a negative ozone bias from GROMOS in the upper mesosphere ( $p < 0.05$  hPa). The seasonal profiles have strong correlations with Pearson’s R coefficients mostly above 0.5 at most pressure levels.



Figure 9 shows scatter plots of their differences in three pressure level domains corresponding approximately to the lower stratosphere, the upper stratosphere and the lower mesosphere (see Table 4 for the definitions). It shows the net difference in atmospheric opacity between the winter and the summer and highlights the higher ozone variability during the winter time. It results in stronger correlations in the winter and lower values during the summer season at all pressure ranges. Overall though, there is a good agreement between GROMOS and SOMORA data series in the middle atmosphere.

In addition to these seasonal effects, Fig. 10 highlights some sudden changes in the differences between the two instruments, most of which can be related to specific instrumental issue on either instrument. It can be seen for instance in April 2012, where the cold load observation angle was changed on SOMORA, reducing significantly its baseline. Another example is the strong negative ozone differences during of the summer 2016 which were due to a frequency lock problem of GROMOS. Finally, the large flagged period starting at the end of 2019 marks the beginning of several instrumental issues on SOMORA which were finally solved by the replacement of its spectrometer in September 2020. All these issues have been identified, documented and are flagged accordingly in the new ozone data series. A detailed documentation of the time series can be found together with the data.

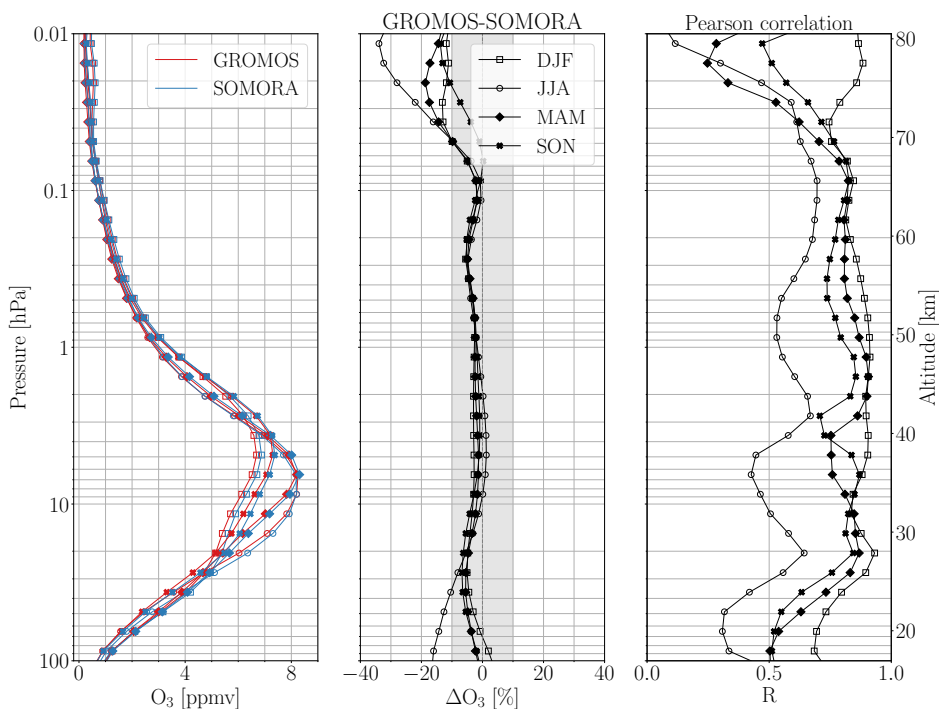

**Figure 8.** Mean seasonal ozone VMR profiles (left panel), their mean relative differences (middle panel) and correlations (right panel). The shaded area in the middle panels indicates the  $\pm 10\%$  interval.

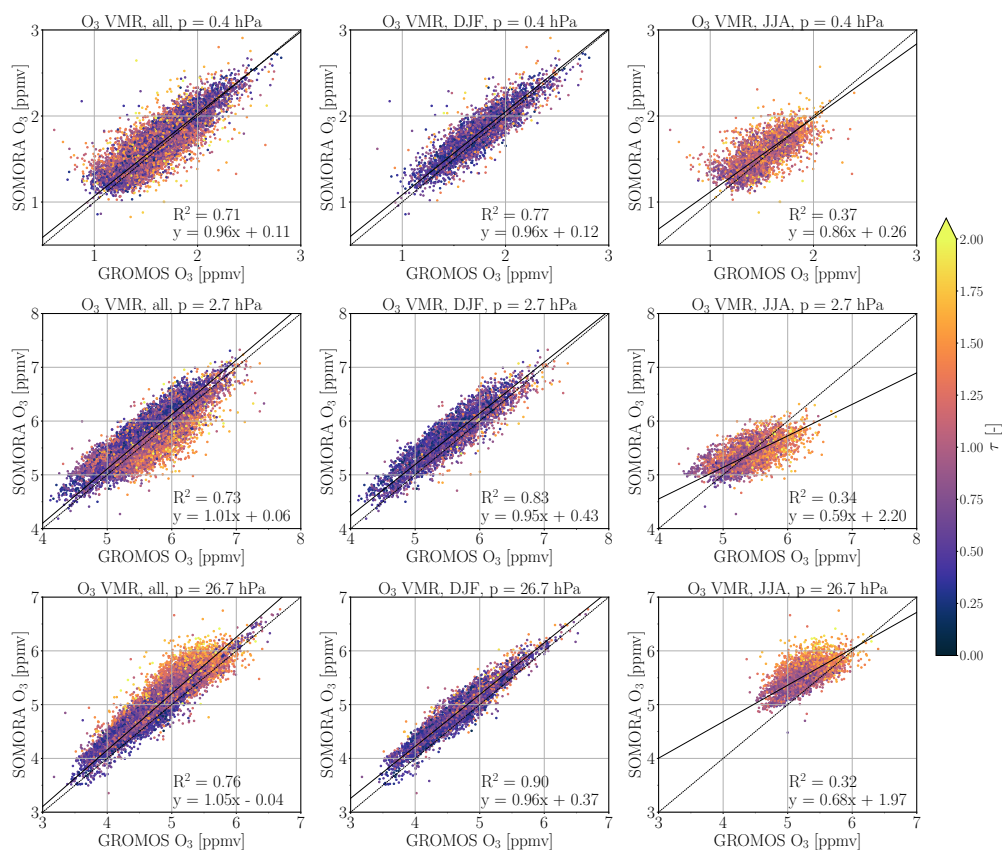

**Figure 9.** Mean ozone VMR for 3 different levels for the whole series (left panel), the boreal winter season (center) and the boreal summer (right). The 3 pressure levels correspond approximately to the lower ( $10 < p < 50$  hPa), upper stratosphere ( $1 < p < 5$  hPa) and lower mesosphere ( $0.1 < p < 0.9$  hPa). All data points are color-coded based on the atmospheric opacity ( $\tau$ ) computed at SOMORA measurement time and location. The linear regression coefficients and their coefficient of determination  $R^2$  are indicated on each subplot.

## 285 4.2 Comparison with previous retrievals

Computing trends for GROMOS and SOMORA is out of scope of this contribution but, still, we would like to provide some first elements of answer to whether this harmonization can help solving the discrepancies found previously between both instruments (Bernet et al., 2019; Petropavlovskikh et al., 2019). Therefore, we compare our new harmonized ozone time series with the previous data version of GROMOS and SOMORA.

290 Figure 1 shows the daily relative differences between the new harmonized series (upper panel) and the previous retrievals (lower panel) from 2010 to 2021. It highlights the significant improvements introduced by the harmonization process in most of the pressure range covered by the radiometers. Among other changes, it corrects the strong positive ozone bias from GROMOS seen in the mesosphere and reduces the stratospheric ozone difference clearly visible in many years of the previous data series



295 at  $\sim 10$  hPa. The previous series were also showing a quite strong seasonal signal which gives confidence that the previously discussed seasonal patterns are not artifacts introduced by the new data processing but are likely linked with the instruments themselves. Whereas the harmonized retrievals improve most of the time period considered, it seems that the problems seen on SOMORA in 2020 are less well treated in the new processing. Indeed, in the previous processing the sine baseline periods were adapted daily during this period whereas the new processing only considered fixed periods. It indicates that the instrumental baselines on SOMORA varied significantly during this period and highlights the need to treat it carefully for further analysis.

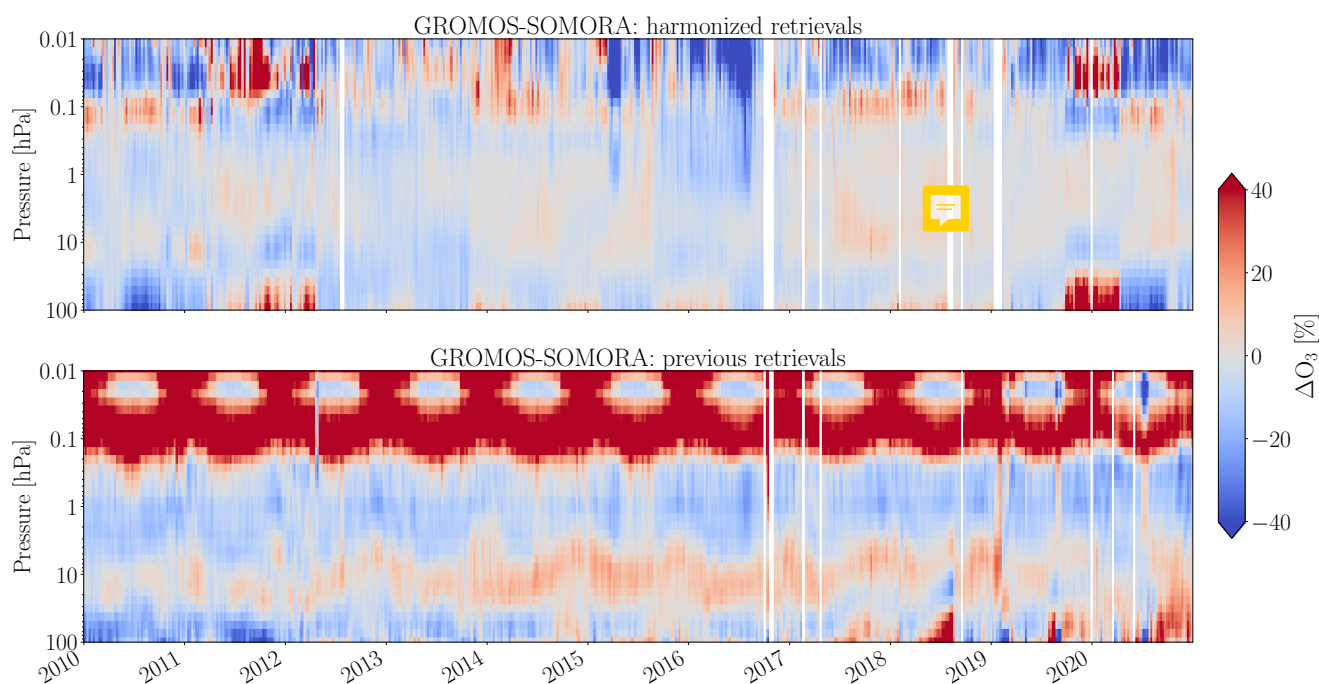

**Figure 10.** Weekly ozone relative difference between the new (upper panel) and the previous (lower panel) GROMOS and SOMORA series.

300 From Fig. 10, it is clear that the harmonized processing reduces significantly the differences between GROMOS and SOMORA ozone time series. However, the question remains if it can solve the discrepancies found between their respective trends. Of course, the full reprocessing of the series (including the decade 2000-2010) would be needed to fully answer this question but we present here some preliminary results showing the temporal evolution of the ozone differences between both series in Fig. 11. It shows the weekly mean differences between GROMOS and SOMORA with the previous and new retrieval algorithms in three pressure ranges. Ideally, these differences should be constant to guarantee similar trends from both instruments. Simple linear regressions have been performed on these data and indicates smaller drift intensities at all pressure ranges from the new data processing which are significant above 10 hPa.

305



As a consequence, the future trends to be derived for this decade from the new series should be in better agreement than with the previous retrievals. However, even with the new series, we still observe a drift between both instruments in the stratosphere  
310 which calls for a careful treatment of spurious data periods for the next trends analysis, as done in Bernet et al. (2021).

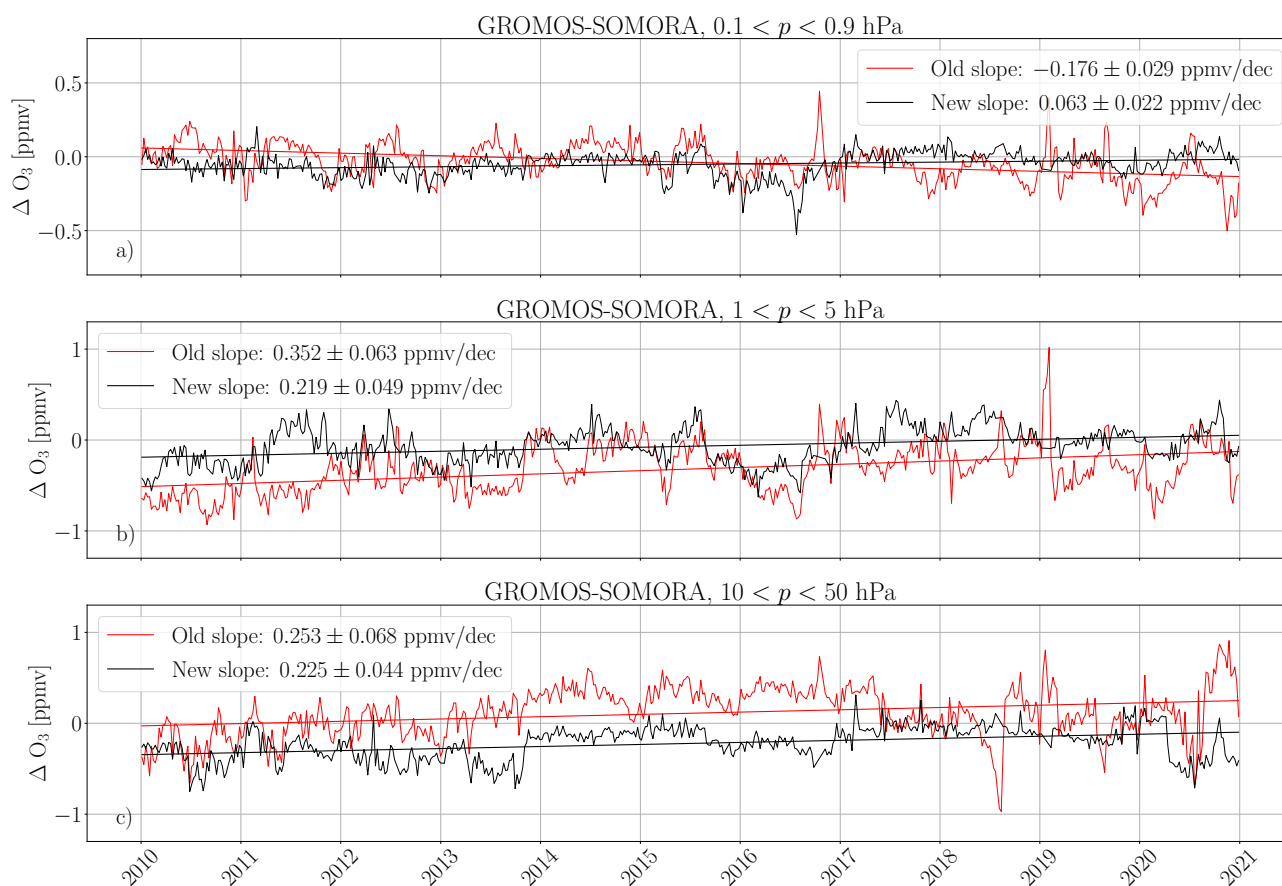

**Figure 11.** Weekly ozone differences between the previous and the new GROMOS and SOMORA series for the three pressure levels defined in Table 4: a) lower mesosphere, b) upper stratosphere and c) lower stratosphere. A linear fit of the differences is shown as straight line for the previous and the new series. The slope values are indicated with a 95 % confidence interval.

## 5 Comparison with satellites

Attention was paid to keep GROMOS and SOMORA data processing fully independent. However, they would be both impacted by any bias introduced by the calibration or retrieval algorithms and therefore, we provide further validation by comparing their observations with satellite measurements.



## 315 5.1 Aura MLS

As the main validation dataset, we use ozone measurements from the Microwave Limb Sounder (MLS) on the Aura satellite launched in 2004 (Waters et al., 2006). It is operated by the National Aeronautics and Space Administration (NASA) in the frame of the Earth Observing System and has been used extensively for ozone profile validation over many regions and against many other observing systems (e.g., Boyd et al., 2007; Livesey et al., 2008; Hubert et al., 2016).

320 MLS is a passive microwave radiometer observing the ozone emission line around 240 GHz in a limb sounding geometry. It follows a sun-synchronous orbit which results in two overpasses per day around 1 AM and 1 PM over central Europe. In this work, we have used the latest level 2 ozone retrievals v5 and the recommended data screening described in Livesey et al. (2022). It results in ozone VMR profiles between 261 to 0.001 hPa with a typical vertical resolution ranging from  $\sim 2.5$  km in the lower stratosphere increasing to  $\sim 5.5$  km at the mesopause with an accuracy of 5 – 10 % in the stratosphere increasing  
325 up to 100 % at 0.01 hPa.

For the following comparisons, we extracted collocated MLS observations to GROMOS and SOMORA. As spatial coincidence criteria, we use  $\pm 3.6^\circ$  in latitude and  $\pm 10.5^\circ$  in longitude from Bern, an area corresponding approximately to Central Europe. As temporal criteria, we averaged the MWR and the MLS profiles within 3 hours time windows and keep only the time windows where both MLS and the MWR have profiles with sufficient data quality.

330 The MLS vertical resolution of ozone retrievals is much lower than the one from the MWRs. It means that the MWRs will essentially observe a smoothed vertical profile compared to the MLS observations. Therefore, the higher resolved MLS profiles are convolved with the MWR averaging kernels for the comparisons (see Connor et al., 1994; Tsou et al., 1995). This AVKs smoothing also enables to remove the influence of the a priori and follows Eq. 1:

$$x_c = x_a + A(x - x_a) \quad (1)$$

335 where  $x$  is the higher resolution profile (MLS),  $x_a$  is the a priori profile from the MWR retrievals,  $A$  are the averaging kernels and  $x_c$  is the resulting convolved profile.

## 5.2 SBUV/2

In addition to MLS, we also use the latest release of the Solar Backscatter Ultraviolet Radiometer (SBUV/2) Merged Ozone Dataset (MOD) (Frith et al., 2020; Ziemke et al., 2021). This dataset provides daily overpasses over many ground-based ozone measurement stations, including Payerne in Switzerland. It provides stratospheric ozone VMR profiles from 50 to 0.5 hPa  
340 merged according to the new MOD v2 Release 1 derived from SBUV and adjusted for the diurnal cycles to an equivalent local measurement time of 1:30 PM. The vertical resolution from the SBUV retrievals is  $\sim 6 - 7$  km in the middle and upper stratosphere (McPeters et al., 2013; Bhartia et al., 2013) which is closer to the vertical resolution of GROMOS and SOMORA in this region. For this reason, contrary to MLS, we do not apply any AVKs smoothing to the SBUV measurements for the  
345 following comparisons.





### 5.3 Time series

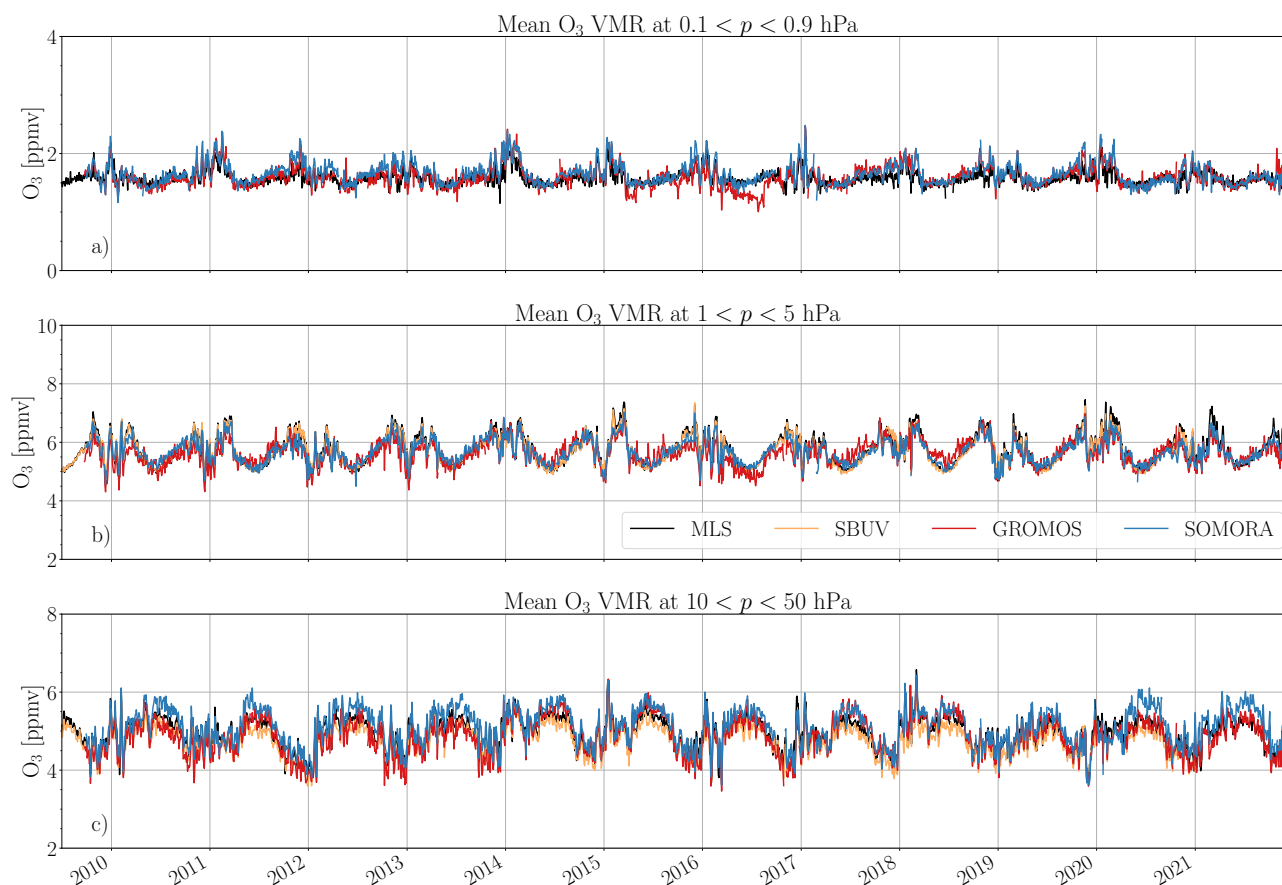

**Figure 12.** Two days averaged ozone VMR from MLS, SBUV, GROMOS and SOMORA at three pressure intervals: a) lower mesosphere, b) upper stratosphere and c) lower stratosphere. The SBUV dataset extends only up to 0.5 hPa and is therefore not shown in a).

Figure 12 shows daily mean GROMOS and SOMORA time series together with SBUV and MLS measurements on three pressure ranges corresponding to the lower, upper stratosphere and lower mesosphere. It shows the consistencies of GROMOS and SOMORA time series and highlights the good agreement of both MWRs with both satellite datasets during the last decade. As these time series are already averaged on given pressure ranges, we did not apply any AVKs smoothing on the MLS data at this stage. Also it is important to keep in mind that the SBUV daily dataset is adjusted to daytime (1.30 PM) whereas both MLS and the MWRs have both day and night time measurements.

In the stratosphere, clear seasonal pattern are well captured by all dataset and the higher winter ozone variability is clearly visible at all pressure levels. On time scale of a few days, we can see that all four dataset are able to capture well the short



355 term ozone variations not only in the stratosphere, but also in the mesosphere where these variations become relatively small compared to the amplitude of the ozone diurnal cycle.

We can see a slight bias of the SOMORA data series in the lower stratosphere. It is especially visible before 2014 and after 2019 as have been mentioned previously. This plot also helps to identify some remaining spurious time periods in the new harmonized series (e.g. GROMOS data in Summer 2016). From a qualitative point of view, we do not observe large drifts from  
360 any of the dataset with respect to the others. More work will be needed to confirm the stability from both MWRs, but it gives some confidence that both instruments can be used for trends analysis in the decade 2010-2020.

#### 5.4 Profile comparisons

As quantitative validation, we show seasonal comparisons of MWRs profiles with the satellite datasets. In the following, we mostly focus on the MLS time series because it covers the same altitude range as the MWRs and because SBUV only provides  
365 daytime measurements. For the period between 2009 and 2021, we obtain more than 7100 collocated profiles between MLS and each MWR, giving approximately 1700 profiles per meteorological season. Figure 13 and 14 show comparisons between winter (resp. summer) ozone profiles measured by GROMOS, SOMORA, SBUV and MLS. Both figures show the mean seasonal ozone profile from each dataset as well as the relative differences between MLS and the MWRs with and without AVK convolution. The comparisons for spring and autumn are shown in Appendix B (Fig. B1 and Fig. B2).

370 Both GROMOS and SOMORA show very good agreement with MLS at most seasons and altitudes. Mean seasonal relative differences between both instruments and collocated MLS profiles are within 10 % in the stratosphere and lower mesosphere (up to  $\sim 60$  km) corresponding to the expected uncertainties of the MWRs. Above in the mesosphere, the relative differences between the MWRs and MLS grows rapidly and shows some oscillations. For most of the higher mesosphere, the mean seasonal relative differences stay below 50 % for both instruments but given the errors reported for the MWRs and MLS at  
375 these altitudes, we will focus our discussion on the region from  $\sim 20$  to 60 km. The relative differences with SBUV (not shown) are very similar to those with MLS and are below 10 % in the whole stratosphere for both instruments.

Figure 14 reveals again the summer bias mentioned previously. Taking MLS as a reference, this plot indicates that the summer bias in the lower stratosphere is the result of an overestimation of ozone by SOMORA during this season. The reason for this could be a seasonal change in the instrumental baselines that is not taken into account in the retrieval. For both  
380 instruments still, the differences with the convolved MLS profiles are smaller in autumn and winter than in spring and summer when the absorption by the troposphere is stronger.

Moreira et al. (2017) compared the previous GROMOS retrieval dataset to MLS between 2009 and 2016. Similar agreement was found in the middle stratosphere however quickly degrading at lower and higher altitudes. This is in accordance with the results shown in Fig. 10 and confirms the improvement brought by the new data processing. SOMORA showed similar  
385 agreement with MLS in the range 25 to 0.1 hPa between 2004 and 2015 (Maillard Barras et al., 2020). Below 25 hPa, SOMORA showed a positive bias compared to other datasets which gives confidence that this bias is not related to the new data processing.

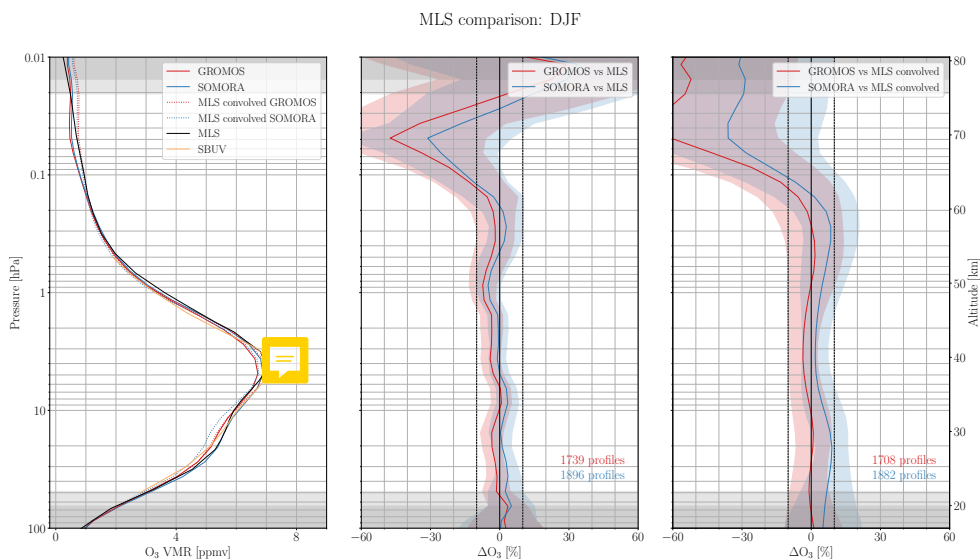

**Figure 13.** Seasonal comparison with MLS and SBUV during winter months (December, January and February). The middle panel shows the relative differences with MLS whereas the right panel shows the relative differences with the convolved MLS profiles. The color shaded areas show the standard deviation of the differences with MLS and the grey shading indicates the limits where the a priori contribution exceeds 20 %. The dashed vertical lines indicate the  $\pm 10\%$  interval.

Similar comparisons between MWR and MLS has been performed at various locations (e.g. Boyd et al., 2007; Palm et al., 2010; Ryan et al., 2016). Compared to other studies, the Swiss MWRs are in close agreement with the simultaneous MLS profiles. This is confirmed by the mean ozone VMR relative difference between MWR and MLS given in Table 5 for the three pressure ranges. Averaged over these pressure ranges, the differences between MLS and the MWRs are less than 5 % in the as defined stratosphere and lower mesosphere.

Overall, SOMORA and GROMOS profiles are in better accordance with the non-convolved MLS than with the convolved MLS profiles. This can be seen for both instruments and at the three pressure ranges from the seasonal plots and in Table 5.

**Table 5.** Mean relative VMR differences  $((\text{MWR}-\text{MLS})/\text{MWR})$  between MWRs and MLS at three pressure ranges, with and without AVK convolution. In parenthesis, we show the standard deviations of the VMR relative differences in each pressure range.

| Pressure range [hPa] | $\Delta\text{O}_{3,\text{GROMOS}}$ [%] | $\Delta\text{O}_{3,\text{GROMOS, convolved}}$ [%] | $\Delta\text{O}_{3,\text{SOMORA}}$ [%] | $\Delta\text{O}_{3,\text{SOMORA, convolved}}$ [%] |
|----------------------|----------------------------------------|---------------------------------------------------|----------------------------------------|---------------------------------------------------|
| 0.9 – 0.1            | −4.1 (3.2)                             | −0.9 (4.0)                                        | −0.9 (4.0)                             | +5.6 (4.3)                                        |
| 5 – 1                | −1.7 (1.1)                             | +2.5 (0.1)                                        | −0.3 (0.8)                             | +5 (0.8)                                          |
| 50 – 10              | −0.7 (1.0)                             | +2.0 (1.4)                                        | +4.2 (1.2)                             | +11.6 (1.4)                                       |

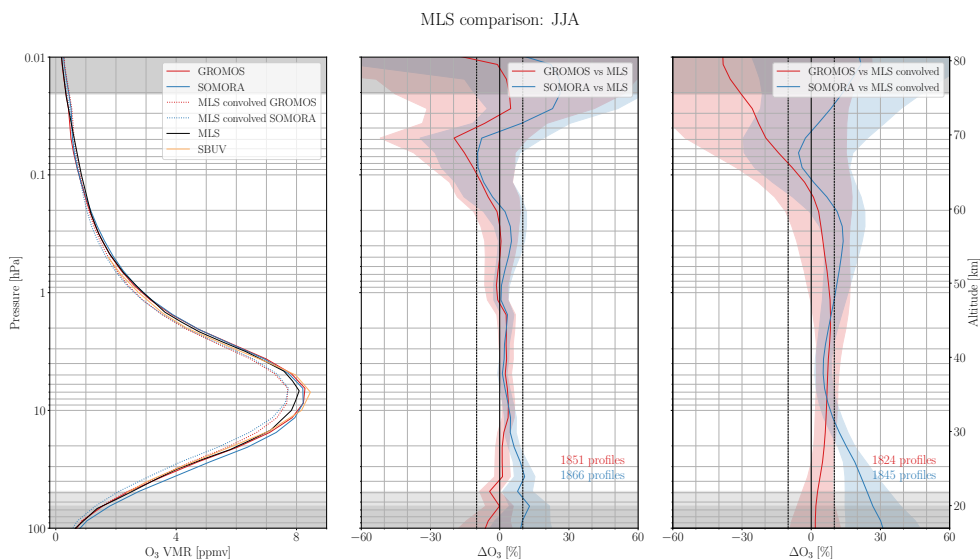

**Figure 14.** Same as Fig. 13 but for summer (June, July and August)

## 395 6 Conclusions

New harmonized data series from two Swiss ozone ground-based microwave radiometers are now available from 2009 until 2021. The reprocessing provides a full harmonization at all levels, from the calibration of the raw data to the retrieval of the ozone profiles. It includes the data inputs and outputs, the flagging systematic, the output temporal resolution and the retrieval grids. The harmonization makes the comparison and the identification of biases easier than in the past. It improves significantly  
400 the agreement between both instruments on this time period and reduces the long-term drift of their differences. It should help to resolve the discrepancies previously found in the trend estimates derived from these two time series.

However, despite these significant improvements, systematic differences remain between the two instruments. It includes a seasonal bias, mostly visible in the lower stratosphere in summer, as well as a negative ozone bias of GROMOS in the upper mesosphere. Further work is needed to fully understand these systematic biases but they probably both arise from instrumental  
405 sources as they were already seen in the previous retrieval versions. In addition, limited anomalous time periods still remain on both instruments but most of their causes are now identified and documented. The new harmonized data series are also compared against two independent and collocated satellite datasets. Both instruments show a good agreement with SBUV and MLS, with mean relative differences below 10 % in most of the stratosphere and lower mesosphere (up to ~ 60km).

The new retrieval products of ozone profiles at Bern and Payerne are available and will be submitted to NDACC. We also  
410 plan to extend the harmonization process to the older observations from these two instruments in order to provide the full harmonized ozone time series since 1994 (GROMOS) and 2000 (SOMORA). The collocation of two harmonized time series with high temporal resolution also opens the way to unique short-term ozone variations analysis.

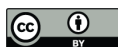

## Appendix A: Uncertainty budget at high atmospheric opacities

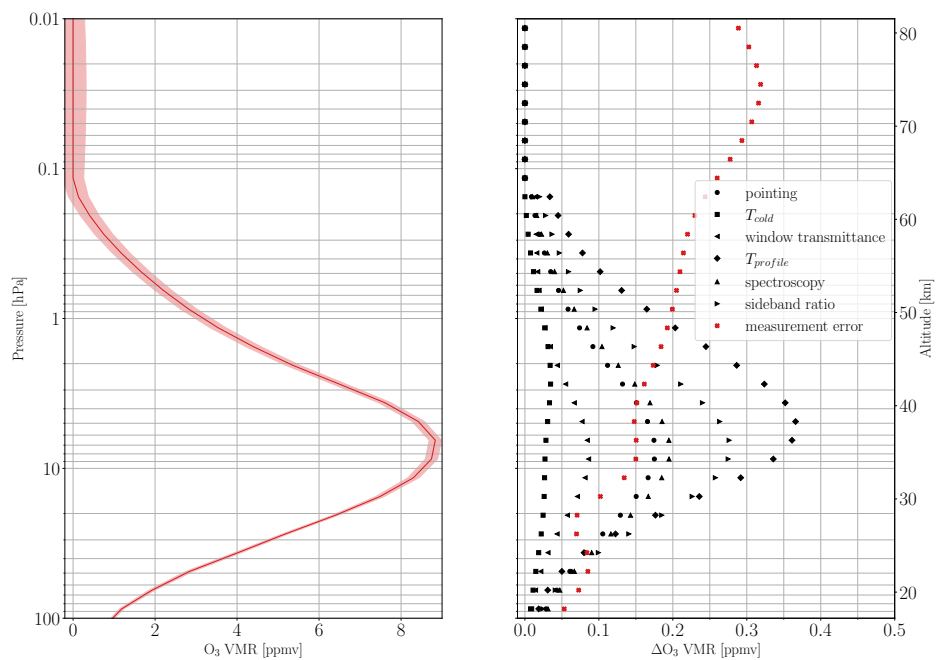

**Figure A1.** Same as Fig. 5 but for GROMOS in the high opacity case.

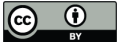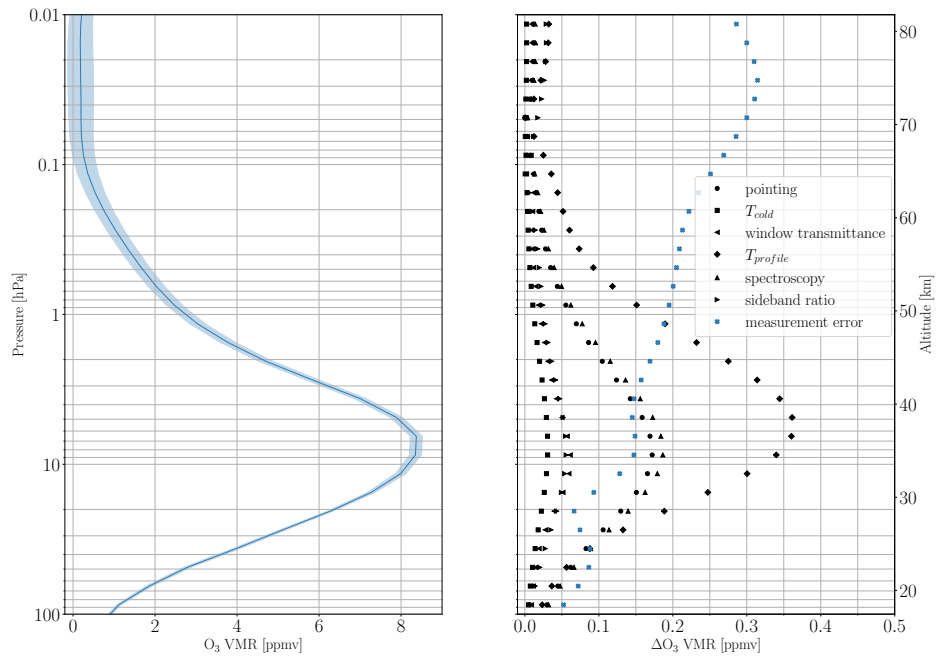

**Figure A2.** Same as Fig. 5 but for SOMORA in the high opacity case.



## Appendix B: Seasonal comparison with MLS and SBUV

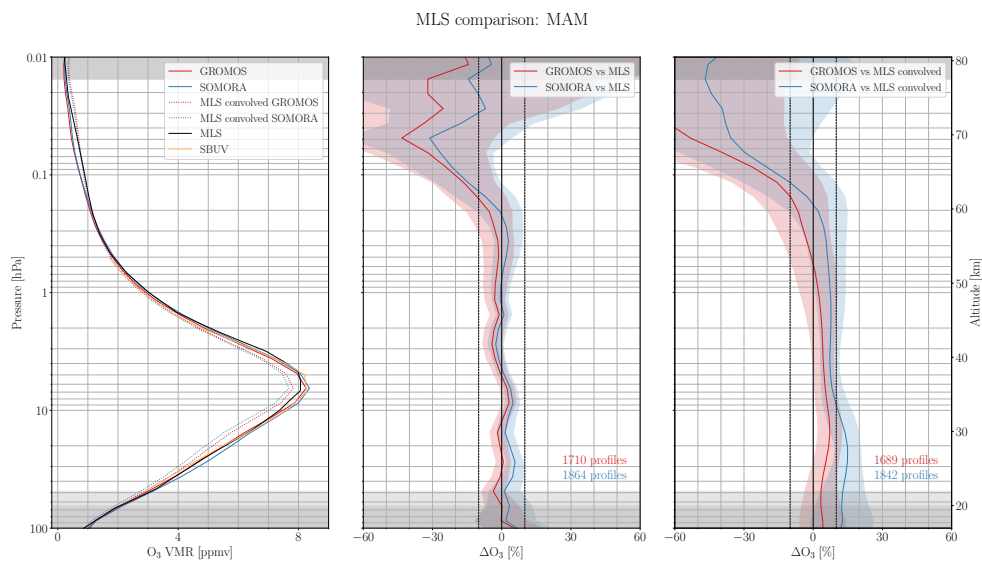

**Figure B1.** Same as Fig. 13 but for spring (March, April and May)

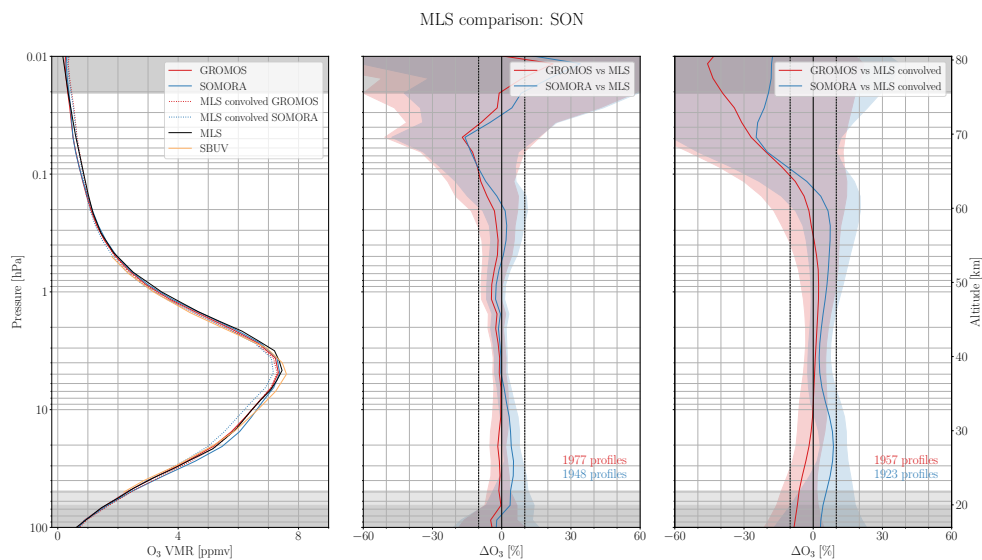

**Figure B2.** Same as Fig. 13 but for autumn (September, October and November)



415 *Code and data availability.* The GROMOS and SOMORA level 2 data will be available from the Bern Open Repository and Information System (University of Bern) in the form of yearly netCDF files. The new harmonized calibration and retrieval routines are freely available at <https://doi.org/10.5281/zenodo.6799357>. The analysis code reproducing all the results presented in this manuscript can be found at <https://doi.org/10.5281/zenodo.6801529>. MLS v5 data are available from the NASA Goddard Space Flight Center Earth Sciences Data and Information Services Center (GES DISC): <https://disc.gsfc.nasa.gov/>. The SBUV MOD dataset are available at [https://acd-ext.gsfc.nasa.gov/Data\\_services/merged/index.html](https://acd-ext.gsfc.nasa.gov/Data_services/merged/index.html)

420

*Author contributions.* ES performed the harmonization project, carried out the data analysis and prepared the manuscript. EM provided the SOMORA data and helped with the data analysis. KH provided the GROMOS data and helped with the data analysis. AH conceived the project and provided advice on the data analysis. AM conceived the project and helped with the data analysis. All of the authors discussed the scientific findings and provided valuable feedback for the manuscript editing.

425 *Competing interests.* The authors declare that they have no conflict of interest.

*Acknowledgements.* This work has been funded by MeteoSwiss and the Swiss Global Atmospheric Watch program. The authors acknowledge all the people that took care of GROMOS and SOMORA since more than 20 years, in particular Nik Jaussi, Andres Luder and Tobias Plüss. Also, they would like to thank the numerous developers that contributed to the free and open source tools used for the data analysis and visualization, in particular xarray (Hoyer and Hamman, 2017), Matplotlib (Hunter, 2007), Typhon, pyretrievals, and the ARTS community

430 for their precious help and support.





## References

- Anderson, J., Russell Iii, J., Solomon, S., and Deaver, L.: Halogen Occultation Experiment confirmation of stratospheric chlorine decreases in accordance with the Montreal Protocol, *Journal of Geophysical Research: Atmospheres*, 105, 4483–4490, 2000.
- Ball, W. T., Alsing, J., Mortlock, D. J., Staehelin, J., Haigh, J. D., Peter, T., Tummon, F., Stübi, R., Stenke, A., Anderson, J., Bourassa, A.,  
435 Davis, S. M., Degenstein, D., Frith, S., Froidevaux, L., Roth, C., Sofieva, V., Wang, R., Wild, J., Yu, P., Ziemke, J. R., and Rozanov, E. V.: Evidence for a continuous decline in lower stratospheric ozone offsetting ozone layer recovery, *Atmospheric Chemistry and Physics*, 18, 1379–1394, <https://doi.org/10.5194/acp-18-1379-2018>, publisher: Copernicus GmbH, 2018.
- Benz, A. O., Grigis, P. C., Hungerbühler, V., Meyer, H., Monstein, C., Stuber, B., and Zardet, D.: A broadband FFT spectrometer for radio and millimeter astronomy, *Astronomy & Astrophysics*, 442, 767–773, <https://doi.org/10.1051/0004-6361:20053568>, 2005.
- 440 Bernet, L., Clarmann, T. v., Godin-Beekmann, S., Ancellet, G., Maillard Barras, E., Stübi, R., Steinbrecht, W., Kämpfer, N., and Hocke, K.: Ground-based ozone profiles over central Europe: incorporating anomalous observations into the analysis of stratospheric ozone trends, *Atmospheric Chemistry and Physics*, 19, 4289–4309, <https://doi.org/10.5194/acp-19-4289-2019>, 2019.
- Bernet, L., Boyd, I., Nedoluha, G., Querel, R., Swart, D., and Hocke, K.: Validation and Trend Analysis of Stratospheric Ozone Data from Ground-Based Observations at Lauder, New Zealand, *Remote Sensing*, 13, <https://doi.org/10.3390/rs13010109>, 2021.
- 445 Bhartia, P. K., McPeters, R. D., Flynn, L. E., Taylor, S., Kramarova, N. A., Frith, S., Fisher, B., and DeLand, M.: Solar Backscatter UV (SBUV) total ozone and profile algorithm, *Atmospheric Measurement Techniques*, 6, 2533–2548, <https://doi.org/10.5194/amt-6-2533-2013>, 2013.
- Boyd, I. S., Parrish, A. D., Froidevaux, L., Clarmann, T. v., Kyrölä, E., Russell, J. M., and Zawodny, J. M.: Ground-based microwave ozone radiometer measurements compared with Aura-MLS v2.2 and other instruments at two Network for Detection of Atmospheric  
450 Composition Change sites, *Journal of Geophysical Research: Atmospheres*, 112, <https://doi.org/10.1029/2007JD008720>, 2007.
- Braesicke, P., Neu, J., Fioletov, V., Godin-Beekmann, S., Hubert, D., Petropavlovskikh, I., Shiotani, M., and Sinnhuber, B.-M.: Global Ozone: Past, Present, and Future, Chapter 3 in: *Scientific Assessment of Ozone Depletion: 2018*, Global Ozone Research and Monitoring Project - Report No. 58, World Meteorological Organization, Geneva, Switzerland, 2018.
- Buehler, S. A., Eriksson, P., Kuhn, T., von Engel, A., and Verdes, C.: ARTS, the atmospheric radiative transfer simulator, *Journal of  
455 Quantitative Spectroscopy and Radiative Transfer*, 91, 65–93, <https://doi.org/10.1016/j.jqsrt.2004.05.051>, 2005.
- Buehler, S. A., Mendrok, J., Eriksson, P., Perrin, A., Larsson, R., and Lemke, O.: ARTS, the Atmospheric Radiative Transfer Simulator - Version 2.2, the planetary toolbox edition, *Geoscientific Model Development*, 11, 1537–1556, <https://doi.org/10.5194/gmd-11-1537-2018>, 2018.
- Calisesi, Y.: The Stratospheric Ozone Monitoring Radiometer SOMORA: NDSC Application Document, p. 63, 2003.
- 460 Chandra, S., Fleming, E. L., Schoeberl, M. R., and Barnett, J. J.: Monthly mean global climatology of temperature, wind, geopotential height and pressure for 0–120 km, *Advances in Space Research*, 10, 3–12, 1990.
- Connor, B. J., Siskind, D. E., Tsou, J., Parrish, A., and Remsberg, E. E.: Ground-based microwave observations of ozone in the upper stratosphere and mesosphere, *Journal of Geophysical Research: Atmospheres*, 99, 16 757–16 770, <https://doi.org/10.1029/94JD01153>, 1994.
- 465 Crutzen, P. J.: The influence of nitrogen oxides on the atmospheric ozone content, *Quarterly Journal of the Royal Meteorological Society*, 96, 320–325, <https://doi.org/10.1002/qj.49709640815>, 1970.



- De Mazière, M., Thompson, A. M., Kurylo, M. J., Wild, J. D., Bernhard, G., Blumenstock, T., Braathen, G. O., Hannigan, J. W., Lambert, J.-C., Leblanc, T., McGee, T. J., Nedoluha, G., Petropavlovskikh, I., Seckmeyer, G., Simon, P. C., Steinbrecht, W., and Strahan, S. E.: The Network for the Detection of Atmospheric Composition Change (NDACC): history, status and perspectives, *Atmospheric Chemistry and Physics*, 18, 4935–4964, <https://doi.org/10.5194/acp-18-4935-2018>, 2018.
- 470 Eriksson, P., Ekström, M., Melsheimer, C., and Buehler, S. A.: Efficient forward modelling by matrix representation of sensor responses, *International Journal of Remote Sensing*, 27, 1793–1808, 2006.
- Eriksson, P., Buehler, S., Davis, C., Emde, C., and Lemke, O.: ARTS, the atmospheric radiative transfer simulator, version 2, *Journal of Quantitative Spectroscopy and Radiative Transfer*, 112, 1551–1558, <https://doi.org/https://doi.org/10.1016/j.jqsrt.2011.03.001>, 2011.
- 475 Eyring, V., Cionni, I., Bodeker, G. E., Charlton-Perez, A. J., Kinnison, D. E., Scinocca, J. F., Waugh, D. W., Akiyoshi, H., Bekki, S., Chipperfield, M. P., Dameris, M., Dhomse, S., Frith, S. M., Garny, H., Gettelman, A., Kubin, A., Langematz, U., Mancini, E., Marchand, M., Nakamura, T., Oman, L. D., Pawson, S., Pitari, G., Plummer, D. A., Rozanov, E., Shepherd, T. G., Shibata, K., Tian, W., Braesicke, P., Hardiman, S. C., Lamarque, J. F., Morgenstern, O., Pyle, J. A., Smale, D., and Yamashita, Y.: Multi-model assessment of stratospheric ozone return dates and ozone recovery in CCMVal-2 models, *Atmospheric Chemistry and Physics*, 10, 9451–9472, <https://doi.org/10.5194/acp-10-9451-2010>, 2010.
- 480 Fahey, D., Newman, P. A., Pyle, J. A., Safari, B., Chipperfield, M. P., Karoly, D., Kinnison, D. E., Ko, M., Santee, M., and Doherty, S. J.: Scientific Assessment of Ozone Depletion: 2018, Global Ozone Research and Monitoring Project-Report No. 58, 2018.
- Farman, J. C., Gardiner, B. G., and Shanklin, J. D.: Large losses of total ozone in Antarctica reveal seasonal ClO<sub>x</sub>/NO<sub>x</sub> interaction, *Nature*, 315, 207–210, 1985.
- 485 Frith, S. M., Bhartia, P. K., Oman, L. D., Kramarova, N. A., McPeters, R. D., and Labow, G. J.: Model-based climatology of diurnal variability in stratospheric ozone as a data analysis tool, *Atmospheric Measurement Techniques*, 13, 2733–2749, <https://doi.org/10.5194/amt-13-2733-2020>, 2020.
- Godin-Beekmann, S., Azouz, N., Sofieva, V., Hubert, D., Petropavlovskikh, I., Effertz, P., Ancellet, G., Degenstein, D., Zawada, D., Froidevaux, L., Frith, S., Wild, J., Davis, S., Steinbrecht, W., Leblanc, T., Querel, R., Tourpali, K., Damadeo, R., Maillard-Barras, E., Stübi, R., Vigouroux, C., Arosio, C., Nedoluha, G., Boyd, I., and van Malderen, R.: Updated trends of the stratospheric ozone vertical distribution in the 60°S–60°N latitude range based on the LOTUS regression model, *Atmospheric Chemistry and Physics Discussions*, 2022, 1–28, <https://doi.org/10.5194/acp-2022-137>, 2022.
- 490 Haefele, A., Hocke, K., Kämpfer, N., Keckhut, P., Marchand, M., Bekki, S., Morel, B., Egorova, T., and Rozanov, E.: Diurnal changes in middle atmospheric H<sub>2</sub>O and O<sub>3</sub>: Observations in the Alpine region and climate models, *Journal of Geophysical Research: Atmospheres*, 113, <https://doi.org/10.1029/2008JD009892>, 2008.
- 495 Hocke, K., Kämpfer, N., Ruffieux, D., Froidevaux, L., Parrish, A., Boyd, I., von Clarmann, T., Steck, T., Timofeyev, Y. M., Polyakov, A. V., and Kyrölä, E.: Comparison and synergy of stratospheric ozone measurements by satellite limb sounders and the ground-based microwave radiometer SOMORA, *Atmospheric Chemistry and Physics*, 7, 4117–4131, <https://doi.org/10.5194/acp-7-4117-2007>, 2007.
- Hoyer, S. and Hamman, J.: xarray: ND labeled arrays and datasets in Python, *Journal of Open Research Software*, 5, 2017.
- 500 Hubert, D., Lambert, J.-C., Verhoelst, T., Granville, J., Keppens, A., Baray, J.-L., Bourassa, A. E., Cortesi, U., Degenstein, D. A., Froidevaux, L., Godin-Beekmann, S., Hoppel, K. W., Johnson, B. J., Kyrölä, E., Leblanc, T., Lichtenberg, G., Marchand, M., McElroy, C. T., Murtagh, D., Nakane, H., Portafaix, T., Querel, R., Russell III, J. M., Salvador, J., Smit, H. G. J., Stebel, K., Steinbrecht, W., Strawbridge, K. B., Stübi, R., Swart, D. P. J., Taha, G., Tarasick, D. W., Thompson, A. M., Urban, J., van Gijssel, J. A. E., Van Malderen, R., von der Gathen, P.,



- Walker, K. A., Wolfram, E., and Zawodny, J. M.: Ground-based assessment of the bias and long-term stability of 14 limb and occultation  
505 ozone profile data records, *Atmospheric Measurement Techniques*, 9, 2497–2534, <https://doi.org/10.5194/amt-9-2497-2016>, 2016.
- Hunter, J. D.: Matplotlib: A 2D graphics environment, *IEEE Annals of the History of Computing*, 9, 90–95, 2007.
- Ingold, T., Peter, R., and Kämpfer, N.: Weighted mean tropospheric temperature and transmittance determination at millimeter-wave fre-  
quencies for ground-based applications, *Radio Science*, 33, 905–918, <https://doi.org/10.1029/98RS01000>, 1998.
- Janssen, M. A., ed.: *Atmospheric remote sensing by microwave radiometry*, chap. 7, pp. 358–375, Wiley series in remote sensing, Wiley,  
510 New York, 1993.
- Kopp, G., Berg, H., Blumenstock, T., Fischer, H., Hase, F., Hochschild, G., Höpfner, M., Kouker, W., Reddmann, T., Ruhnke, R., et al.:  
Evolution of ozone and ozone-related species over Kiruna during the SOLVE/THESEO 2000 campaign retrieved from ground-based  
millimeter-wave and infrared observations, *Journal of Geophysical Research: Atmospheres*, 107, SOL–51, 2002.
- Krochin, W., Navas-Guzmán, F., Kuhl, D., Murk, A., and Stober, G.: Continuous temperature soundings at the stratosphere and lower  
515 mesosphere with a ground-based radiometer considering the Zeeman effect, *Atmospheric Measurement Techniques*, 15, 2231–2249,  
<https://doi.org/10.5194/amt-15-2231-2022>, 2022.
- Livesey, N., Filipiak, M., Froidevaux, L., Read, W., Lambert, A., Santee, M., Jiang, J., Pumphrey, H., Waters, J., Cofield, R., et al.: Validation  
of Aura Microwave Limb Sounder O<sub>3</sub> and CO observations in the upper troposphere and lower stratosphere, *Journal of Geophysical  
Research: Atmospheres*, 113, 2008.
- 520 Livesey, N. J., Read, W. G., Wagner, P. A., Froidevaux, L., Santee, M. L., Schwartz, M. J., Lambert, A., Valle, L. F. M., Pumphrey, H. C., Man-  
ney, G. L., Fuller, R. A., Jarnot, R. F., Knosp, B. W., and Lay, R. R.: Earth Observing System (EOS) Aura Microwave Limb Sounder (MLS)  
Version 5.0x Level 2 and 3 data quality and description document., Tech. rep., <https://mls.jpl.nasa.gov/eos-aura-mls/data-documentation>,  
last access: 20 April 2022, 2022.
- Maillard Barras, E., Haefele, A., Nguyen, L., Tummon, F., Ball, W. T., Rozanov, E. V., Rüfenacht, R., Hocke, K., Bernet, L., Kämpfer, N.,  
525 Nedoluha, G., and Boyd, I.: Study of the dependence of long-term stratospheric ozone trends on local solar time, *Atmospheric Chemistry  
and Physics*, 20, 8453–8471, <https://doi.org/10.5194/acp-20-8453-2020>, 2020.
- McPeters, R. D., Bhartia, P., Haffner, D., Labow, G. J., and Flynn, L.: The version 8.6 SBUV ozone data record: An overview, *Journal of  
Geophysical Research: Atmospheres*, 118, 8032–8039, <https://doi.org/10.1002/jgrd.50597>, 2013.
- Molina, M. J. and Rowland, F. S.: Stratospheric sink for chlorofluoromethanes: chlorine atom-catalysed destruction of ozone, *Nature*, 249,  
530 810–812, <https://doi.org/10.1038/249810a0>, 1974.
- Moreira, L., Hocke, K., Eckert, E., Von Clarmann, T., and Kämpfer, N.: Trend analysis of the 20-year time series of stratospheric ozone  
profiles observed by the GROMOS microwave radiometer at Bern, *Atmospheric chemistry and physics*, 15, 10999–11009, 2015.
- Moreira, L., Hocke, K., and Kämpfer, N.: Comparison of ozone profiles and influences from the tertiary ozone maximum in the night-to-day  
ratio above Switzerland, *Atmospheric Chemistry and Physics*, 17, 10259–10268, <https://doi.org/10.5194/acp-17-10259-2017>, 2017.
- 535 Muller, S. C., Murk, A., Monstein, C., and Kämpfer, N.: Intercomparison of digital fast Fourier transform and acoustooptical spectrometers  
for microwave radiometry of the atmosphere, *IEEE transactions on geoscience and remote sensing*, 47, 2233–2239, 2009.
- Murk, A., Treuttel, J., Rea, S., and Matheson, D.: Characterization of a 340 GHz Sub-Harmonic IQ Mixer with Digital Sideband Separating  
Backend, in: 5th ESA Workshop on Millimetre Wave Technology and Applications, WPP-300, pp. 469–476, 2009.
- Palm, M., Hoffmann, C. G., Golchert, S. H. W., and Notholt, J.: The ground-based MW radiometer OZORAM on Spitsbergen –  
540 description and status of stratospheric and mesospheric O<sub>3</sub>-measurements, *Atmospheric Measurement Techniques*, 3, 1533–1545,  
<https://doi.org/10.5194/amt-3-1533-2010>, 2010.



- Parrish, A., Connor, B. J., Tsou, J. J., McDermid, I. S., and Chu, W. P.: Ground-based microwave monitoring of stratospheric ozone, *Journal of Geophysical Research: Atmospheres*, 97, 2541–2546, <https://doi.org/10.1029/91JD02914>, 1992.
- Perrin, A., Puzarini, C., Colmont, J.-M., Verdes, C., Wlodarczak, G., Cazzoli, G., Buehler, S., Flaud, J.-M., and Demaison, J.: Molecular  
545 Line Parameters for the “MASTER” (Millimeter Wave Acquisitions for Stratosphere/Troposphere Exchange Research) Database, *Journal of Atmospheric Chemistry*, 51, 161–205, <https://doi.org/10.1007/s10874-005-7185-9>, 2005.
- Peter: The Ground-based Millimeter-wave Ozone Spectrometer - GROMOS, Tech. rep., 1997.
- Petropavlovskikh, I., Godin-Beekmann, S., Hubert, D., Damadeo, R., Hassler, B., and Sofieva, V.: SPARC/IO3C/GAW report on Long-term  
550 Ozone Trends and Uncertainties in the Stratosphere, <https://doi.org/10.17874/f899e57a20b>, SPARC Report No. 9, GAW Report No. 241, WCRP-17/2018, 2019.
- Rodgers, C. D.: *Inverse Methods for Atmospheric Sounding: Theory and Practice*, World Scientific, 2000.
- Rüfenacht, R., Kämpfer, N., and Murk, A.: First middle-atmospheric zonal wind profile measurements with a new ground-based microwave  
Doppler-spectro-radiometer, *Atmospheric Measurement Techniques*, 5, 2647–2659, <https://doi.org/10.5194/amt-5-2647-2012>, 2012.
- Ryan, N. J., Walker, K. A., Raffalski, U., Kivi, R., Gross, J., and Manney, G. L.: Ozone profiles above Kiruna from two ground-based  
555 radiometers, *Atmospheric Measurement Techniques*, 9, 4503–4519, <https://doi.org/10.5194/amt-9-4503-2016>, 2016.
- Sauvageat, E.: Calibration routine for ground-based passive microwave radiometer: a user guide, <https://doi.org/10.48350/164418>, 2021.
- Sauvageat, E.: Harmonized ozone profile retrievals from GROMOS and SOMORA, <https://doi.org/10.48350/170121>, 2022.
- Sauvageat, E., Albers, R., Kotiranta, M., Hocke, K., Gomez, R. M., Nedoluha, G. E., and Murk, A.: Comparison of Three High Resolution  
560 Real-Time Spectrometers for Microwave Ozone Profiling Instruments, *IEEE Journal of Selected Topics in Applied Earth Observations and Remote Sensing*, 14, 10 045–10 056, <https://doi.org/10.1109/JSTARS.2021.3114446>, 2021.
- Schanz, A., Hocke, K., and Kämpfer, N.: Daily ozone cycle in the stratosphere: global, regional and seasonal behaviour modelled with the  
Whole Atmosphere Community Climate Model, *Atmospheric Chemistry and Physics*, 14, 7645–7663, <https://doi.org/10.5194/acp-14-7645-2014>, 2014.
- Solomon, P., Barrett, J., Mooney, T., Connor, B., Parrish, A., and Siskind, D. E.: Rise and decline of active chlorine in the stratosphere,  
565 *Geophysical research letters*, 33, 2006.
- Solomon, S., Garcia, R. R., Rowland, F. S., and Wuebbles, D. J.: On the depletion of Antarctic ozone, *Nature*, 321, 755–758, 1986.
- Solomon, S., Ivy, D. J., Kinnison, D., Mills, M. J., Neely III, R. R., and Schmidt, A.: Emergence of healing in the Antarctic ozone layer,  
*Science*, 353, 269–274, 2016.
- Steinbrecht, W., Froidevaux, L., Fuller, R., Wang, R., Anderson, J., Roth, C., Bourassa, A., Degenstein, D., Damadeo, R., and Zawodny, J.:  
570 An update on ozone profile trends for the period 2000 to 2016, *Atmospheric chemistry and physics*, 17, 10 675–10 690, 2017.
- Tsou, J. J., Connor, B. J., Parrish, A., McDermid, I. S., and Chu, W. P.: Ground-based microwave monitoring of middle atmosphere  
ozone: Comparison to lidar and Stratospheric and Gas Experiment II satellite observations, *Journal of Geophysical Research*, 100, 3005,  
<https://doi.org/10.1029/94JD02947>, 1995.
- Tummon, F., Hassler, B., Harris, N. R. P., Staehelin, J., Steinbrecht, W., Anderson, J., Bodeker, G. E., Bourassa, A., Davis, S. M., Degenstein,  
575 D., Frith, S. M., Froidevaux, L., Kyrölä, E., Laine, M., Long, C., Penckwitt, A. A., Sioris, C. E., Rosenlof, K. H., Roth, C., Wang, H.-J., and  
Wild, J.: Intercomparison of vertically resolved merged satellite ozone data sets: interannual variability and long-term trends, *Atmospheric  
Chemistry and Physics*, 15, 3021–3043, <https://doi.org/10.5194/acp-15-3021-2015>, 2015.
- Ulaby, F. and Long, D.: *Microwave Radar and Radiometric Remote Sensing*, chap. 6-7, pp. 226–320, University of Michigan Press,  
<https://doi.org/10.3998/0472119356>, 2014.



- 580 University of Bern: Bern Open Repository and Information System BORIS, <https://boris-portal.unibe.ch/cris/project/pj00023>, last access: 27 June 2022.
- von der Gathen, P., Kivi, R., Wohltmann, I., Salawitch, R. J., and Rex, M.: Climate change favours large seasonal loss of Arctic ozone, *Nature Communications*, 12, 1–17, <https://doi.org/10.1038/s41467-021-24089-6>, 2021.
- Waters, J., Froidevaux, L., Harwood, R., Jarnot, R., Pickett, H., Read, W., Siegel, P., Cofield, R., Filipiak, M., Flower, D., Holden, J., Lau,  
585 G., Livesey, N., Manney, G., Pumphrey, H., Santee, M., Wu, D., Cuddy, D., Lay, R., Loo, M., Perun, V., Schwartz, M., Stek, P., Thurstans, R., Boyles, M., Chandra, K., Chavez, M., Chen, G.-S., Chudasama, B., Dodge, R., Fuller, R., Girard, M., Jiang, J., Jiang, Y., Knosp, B., LaBelle, R., Lam, J., Lee, K., Miller, D., Oswald, J., Patel, N., Pukala, D., Quintero, O., Scaff, D., Van Snyder, W., Tope, M., Wagner, P., and Walch, M.: The Earth observing system microwave limb sounder (EOS MLS) on the aura Satellite, *IEEE Transactions on Geoscience and Remote Sensing*, 44, 1075–1092, <https://doi.org/10.1109/TGRS.2006.873771>, 2006.
- 590 Ziemke, J. R., Labow, G. J., Kramarova, N. A., McPeters, R. D., Bhartia, P. K., Oman, L. D., Frith, S. M., and Haffner, D. P.: A global ozone profile climatology for satellite retrieval algorithms based on Aura MLS measurements and the MERRA-2 GMI simulation, *Atmospheric Measurement Techniques*, 14, 6407–6418, <https://doi.org/10.5194/amt-14-6407-2021>, 2021.
